# Supplementary material for: Stable mixed-valence diphenylphosphanido bridged platinum(ii)–platinum(iv) complexes
Source: Royal Society of Chemistry journal article supplement (doi:10.1039/d0dt00712a), 2020-01-01
Supplement: d0dt00712a1.pdf [file d0dt00712a1.pdf]

## SUPPORTING INFORMATION

for

Stable Mixed-Valence Diphenylphosphanido Bridged Platinum(II)- Platinum(IV) Complexes

by

Consuelo Fortuño\*, Antonio Martín, Mario Latronico, Stefano Todisco, Valentina Petrelli, Piero  
Mastrorilli\*

## CONTENT

- Figure S1:  $^{19}\text{F}$  spectrum of **4**  
Figure S2:  $^{19}\text{F}$  EXSY spectrum of **4**  
Figure S3:  $^{19}\text{F}$  COSY spectrum of **4**  
Figure S4:  $^1\text{H}$  spectrum of **4**  
Figure S5:  $^1\text{H}$  COSY spectrum of **4**  
Figure S6:  $^{31}\text{P}\{^1\text{H}\}$  NMR spectrum of **4**  
Figure S7:  $^1\text{H}$  NMR spectrum of **4**  
Figure S8:  $^1\text{H}$ - $^{31}\text{P}$  HMQC spectrum of **4**  
Figure S9:  $^{19}\text{F}$  NMR spectrum of **2**  
Figure S10:  $^{31}\text{P}\{^1\text{H}\}$  NMR spectrum of **2**  
Figure S11:  $^1\text{H}$  NMR spectrum of **2**  
Figure S12:  $^1\text{H}$ - $^{195}\text{Pt}$  HMQC and  $^{19}\text{F}$ - $^{195}\text{Pt}$  HMQC spectra of **2**  
Figure S13:  $^1\text{H}$  NOESY spectrum of **2**  
Figure S14:  $^1\text{H}$ - $^{31}\text{P}$  HMQC spectrum of **2**  
Figure S15:  $^{19}\text{F}$  NMR spectrum of **3**  
Figure S16:  $^{31}\text{P}\{^1\text{H}\}$  NMR spectrum of **3**  
Figure S17:  $^1\text{H}$  NMR spectrum of **3**  
Figure S18:  $^1\text{H}$ - $^{195}\text{Pt}$  HMQC and  $^{19}\text{F}$ - $^{195}\text{Pt}$  HMQC spectra of **3**  
Figure S19:  $^1\text{H}$  NOESY spectrum of **3**  
Figure S20:  $^1\text{H}$ - $^{31}\text{P}$  HMQC spectrum of **3**  
Figure S21:  $^{19}\text{F}$  NMR spectrum of **5**  
Figure S22:  $^{31}\text{P}\{^1\text{H}\}$  NMR spectrum of **5**  
Figure S23:  $^1\text{H}$  NMR spectrum of **5**  
Figure S24:  $^1\text{H}$ - $^{195}\text{Pt}$  HMQC and  $^{19}\text{F}$ - $^{195}\text{Pt}$  HMQC spectra of **5**  
Figure S25:  $^1\text{H}$  NOESY spectrum of **5**  
Figure S26:  $^1\text{H}$ - $^{31}\text{P}$  HMQC spectrum of **5**

Figure S27:  $^{19}\text{F}$  NMR spectrum of **6**  
Figure S28:  $^{31}\text{P}\{^1\text{H}\}$  NMR spectrum of **6**  
Figure S29:  $^1\text{H}$  NMR spectrum of **6**  
Figure S30:  $^1\text{H}$ - $^{195}\text{Pt}$  HMQC and  $^{19}\text{F}$ - $^{195}\text{Pt}$  HMQC spectra of **6**  
Figure S31:  $^1\text{H}$  NOESY spectrum of **6**  
Figure S32:  $^1\text{H}$ - $^{31}\text{P}$  HMQC spectrum of **6**  
Figure S33:  $^{19}\text{F}$  NMR spectrum of **7**  
Figure S34:  $^{31}\text{P}\{^1\text{H}\}$  NMR spectrum of **7**  
Figure S35:  $^1\text{H}$  NMR spectrum of **7**  
Figure S36:  $^1\text{H}$ - $^{195}\text{Pt}$  HMQC and  $^{19}\text{F}$ - $^{195}\text{Pt}$  HMQC spectra of **7**  
Figure S37:  $^1\text{H}$  NOESY spectrum of **7**  
Figure S38:  $^1\text{H}$ - $^{31}\text{P}$  HMQC spectrum of **7**  
Figure S39:  $^{19}\text{F}$  NMR spectrum of **8**  
Figure S40:  $^{31}\text{P}\{^1\text{H}\}$  NMR spectrum of **8**  
Figure S41:  $^1\text{H}$  NMR spectrum of **8**  
Figure S42:  $^1\text{H}$ - $^{195}\text{Pt}$  HMQC and  $^{19}\text{F}$ - $^{195}\text{Pt}$  HMQC spectra of **8**  
Figure S43:  $^1\text{H}$  NOESY spectrum of **8**  
Figure S44:  $^1\text{H}$ - $^{31}\text{P}$  HMQC spectrum of **8**  
Figure S45:  $^{19}\text{F}$  NMR spectrum of **10**  
Figure S46:  $^{31}\text{P}\{^1\text{H}\}$  NMR spectrum of **10**  
Figure S47:  $^1\text{H}$  NMR spectrum of **10**  
Figure S48:  $^1\text{H}$ - $^{195}\text{Pt}$  HMQC and  $^{19}\text{F}$ - $^{195}\text{Pt}$  HMQC spectra of **10**  
Figure S49: Low-field portion of the  $^1\text{H}$  NOESY spectrum of **10**  
Figure S50: Portion of the  $^1\text{H}$ - $^{31}\text{P}$  HMQC spectrum of **10**  
Figure S51:  $^{19}\text{F}$  NMR spectrum of **11**  
Figure S52:  $^{31}\text{P}\{^1\text{H}\}$  NMR spectrum of **11**  
Figure S53:  $^1\text{H}$  NMR spectrum of **11**  
Figure S54:  $^1\text{H}$ - $^{195}\text{Pt}$  HMQC and  $^{19}\text{F}$ - $^{195}\text{Pt}$  HMQC spectra of **11**  
Figure S55:  $^1\text{H}$  COSY spectrum of **11**  
Figure S56:  $^1\text{H}$ - $^{31}\text{P}$  HMQC spectrum of **11**  
Figure S57:  $^{19}\text{F}$  NMR spectrum of *cis*-**12**  
Figure S58:  $^{31}\text{P}\{^1\text{H}\}$  NMR spectrum of *cis*-**12**  
Figure S59:  $^1\text{H}$  NMR spectrum of *cis*-**12**  
Figure S60:  $^1\text{H}$  NOESY spectrum of *cis*-**12**

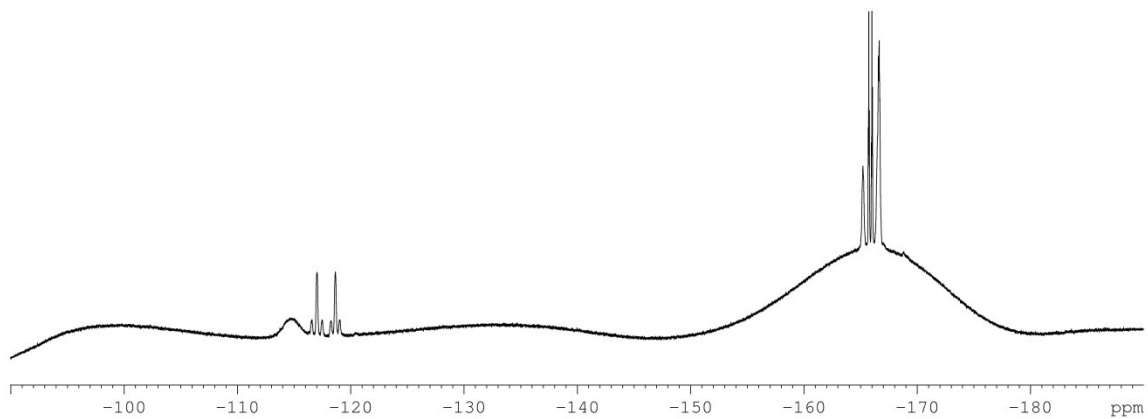

Figure S1:  $^{19}\text{F}$  spectrum of **4** ( $\text{C}_3\text{D}_6\text{O}$ , 376 MHz, 298 K).

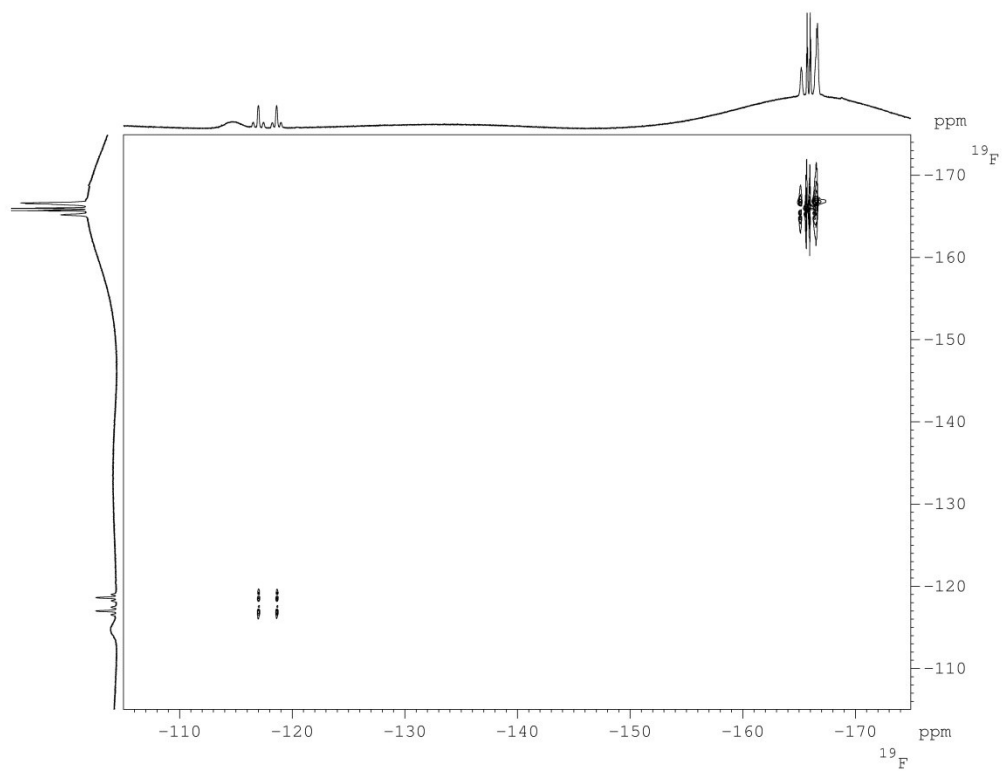

Figure S2:  $^{19}\text{F}$  EXSY spectrum of **4** ( $\text{C}_3\text{D}_6\text{O}$ , 376 MHz, 298 K).

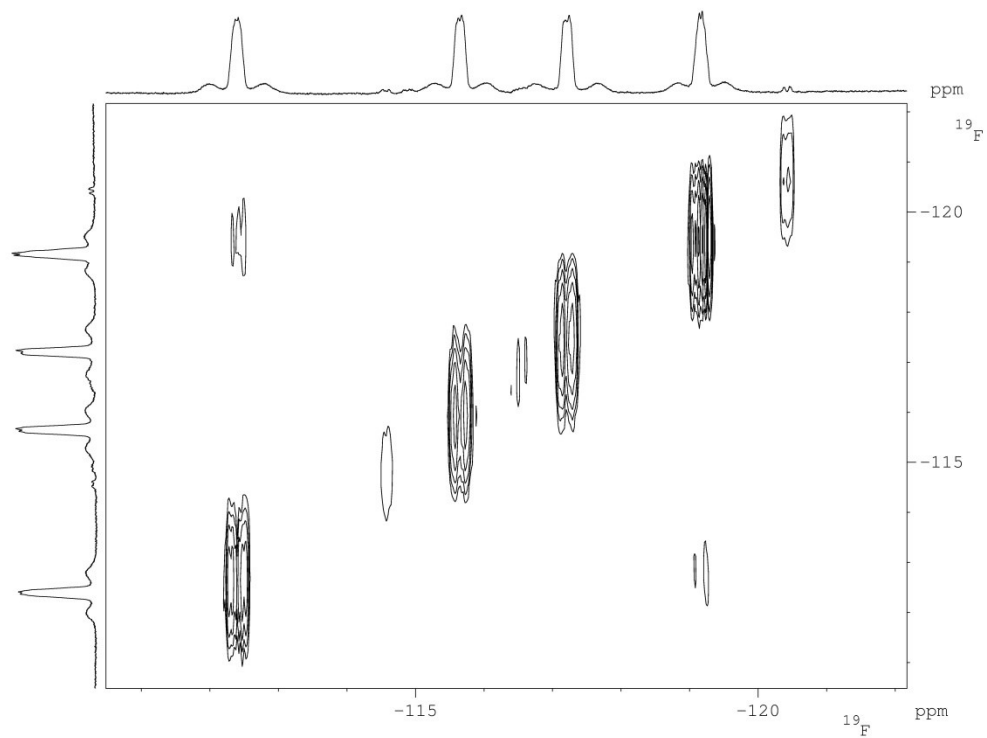

Figure S3: Portion of the  $^{19}\text{F}$  COSY spectrum of **4** ( $\text{C}_3\text{D}_6\text{O}$ , 376 MHz, 198 K).

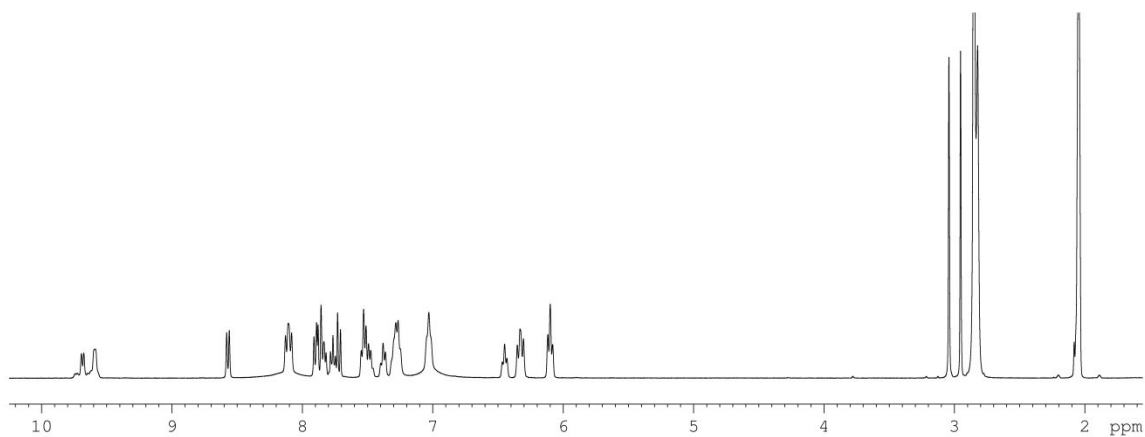

Figure S4:  $^1\text{H}$  spectrum of **4** ( $\text{C}_3\text{D}_6\text{O}$ , 400 MHz, 298 K).

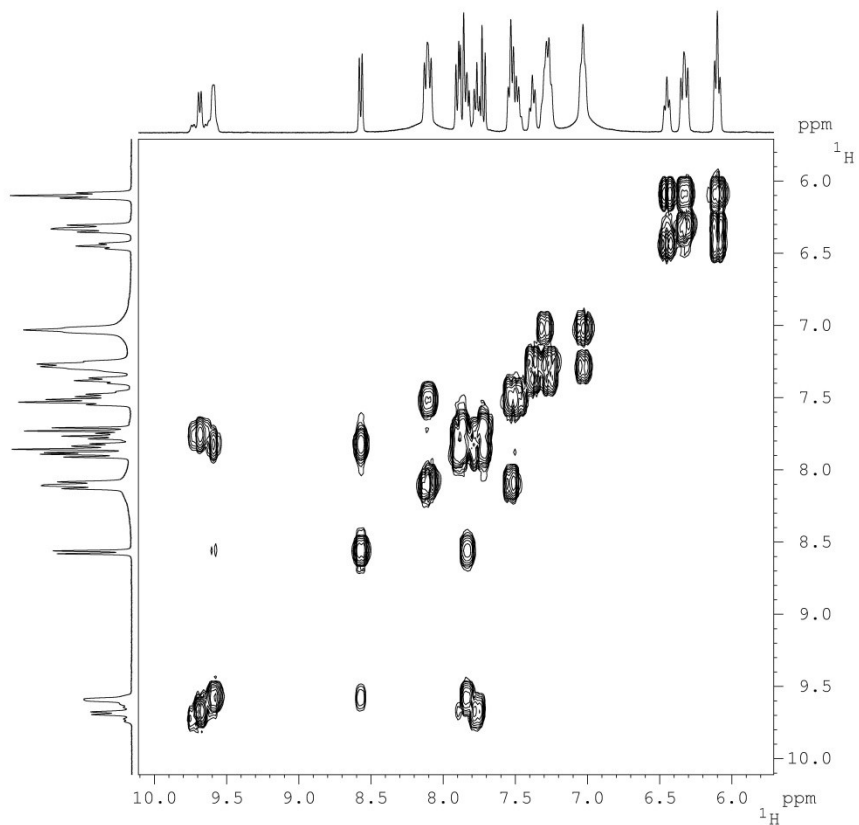

Figure S5: Portion of the  $^1\text{H}$  COSY spectrum of **4** ( $\text{C}_3\text{D}_6\text{O}$ , 400 MHz, 298 K).

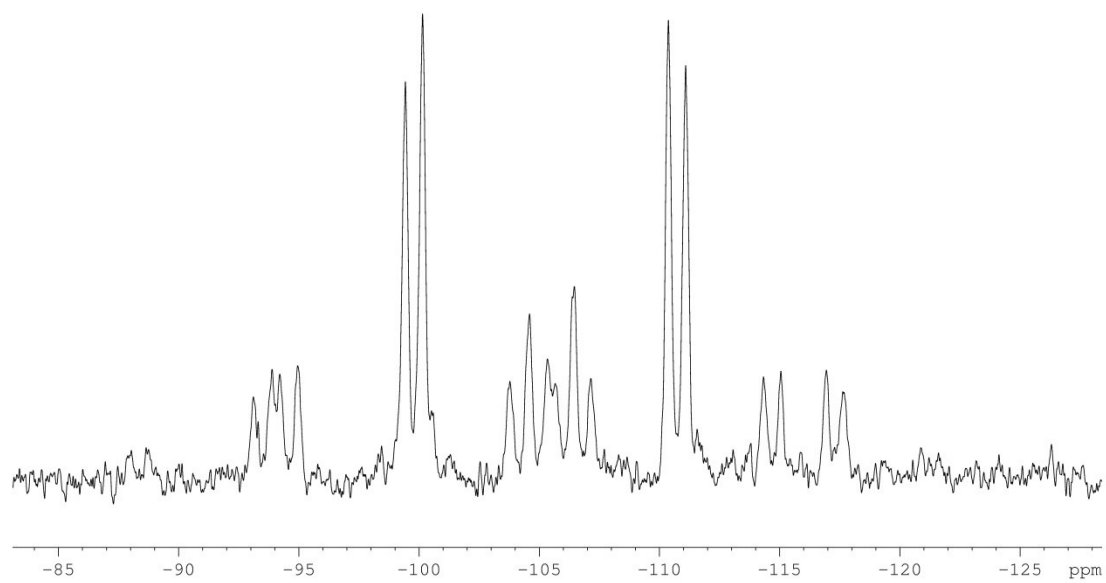

Figure S6:  $^{31}\text{P}\{^1\text{H}\}$  NMR spectrum of **4** ( $\text{C}_3\text{D}_6\text{O}$ , 162 MHz, 298 K).

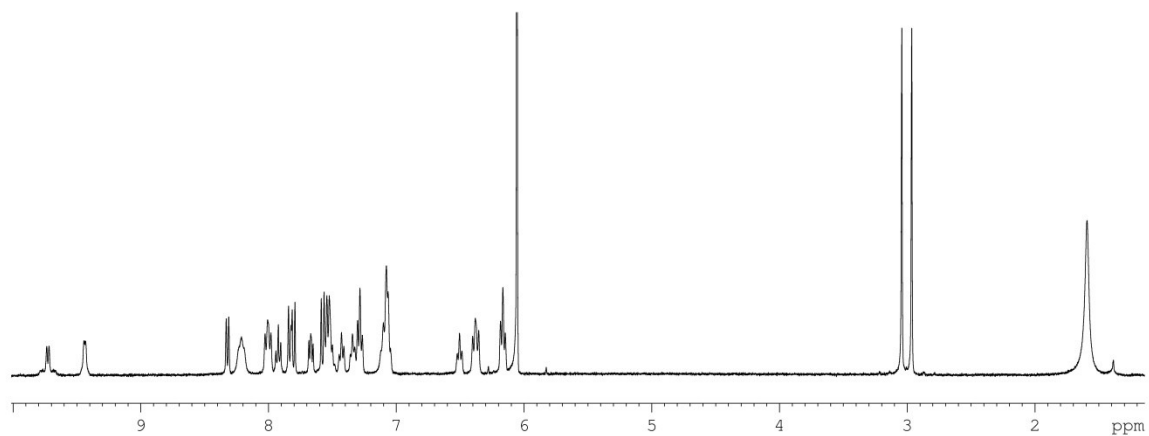

Figure S7:  $^1\text{H}$  NMR spectrum of **4** (348 K, 400 MHz,  $\text{C}_2\text{D}_2\text{Cl}_4$ ).

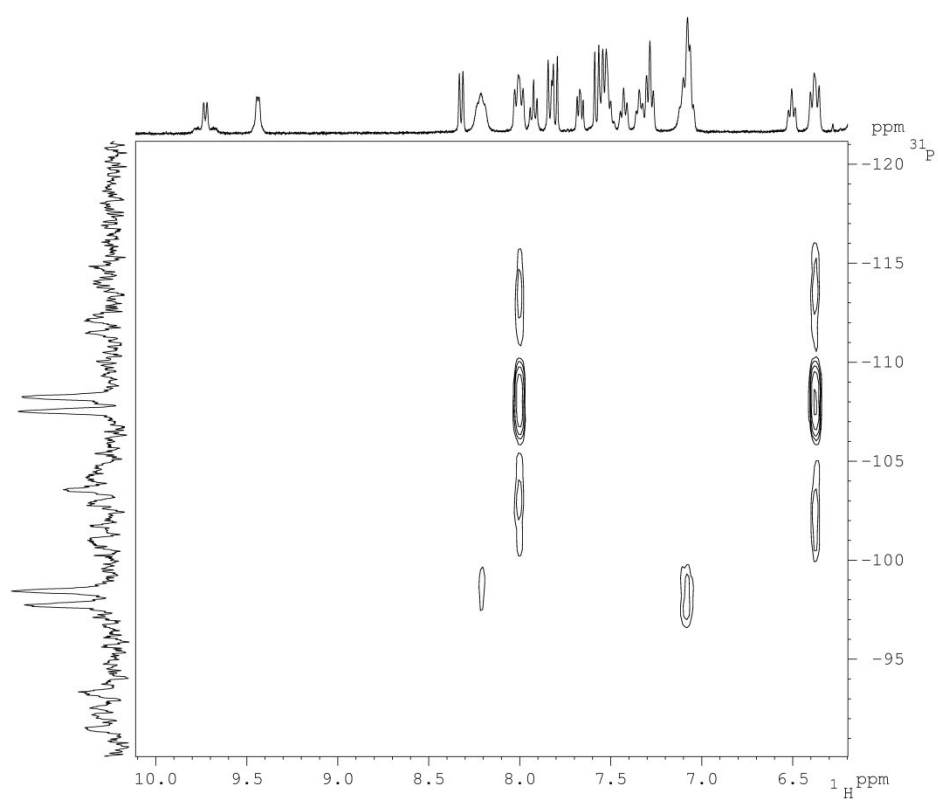

Figure S8: Low-field portion of the  $^1\text{H}$ - $^{31}\text{P}$  HMQC spectrum of **4** ( $\text{C}_2\text{D}_2\text{Cl}_4$ , 348 K).

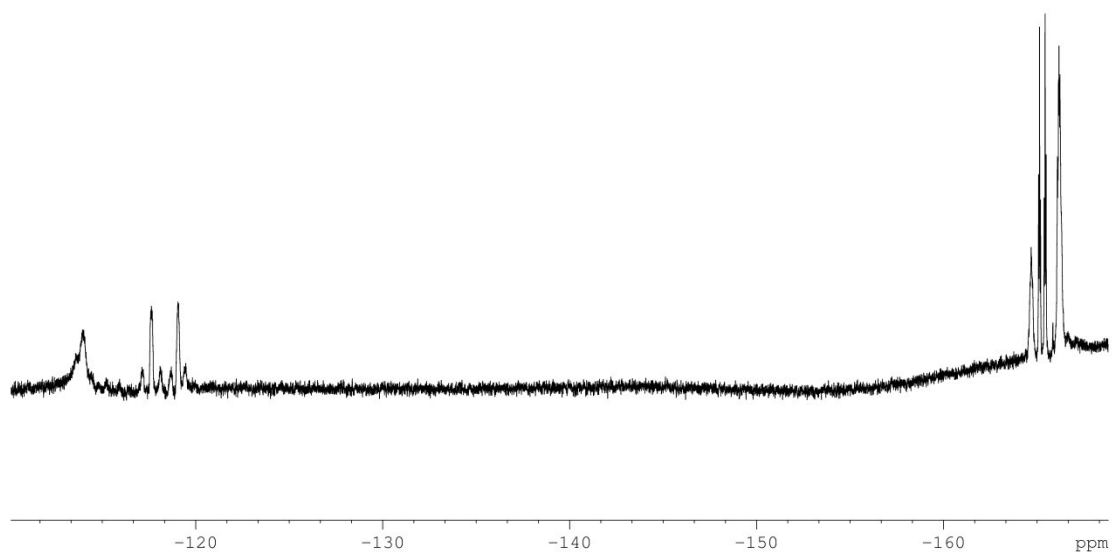

Figure S9:  $^{19}\text{F}$  NMR spectrum of **2** ( $\text{C}_3\text{D}_6\text{O}$ , 376 MHz, 298 K)

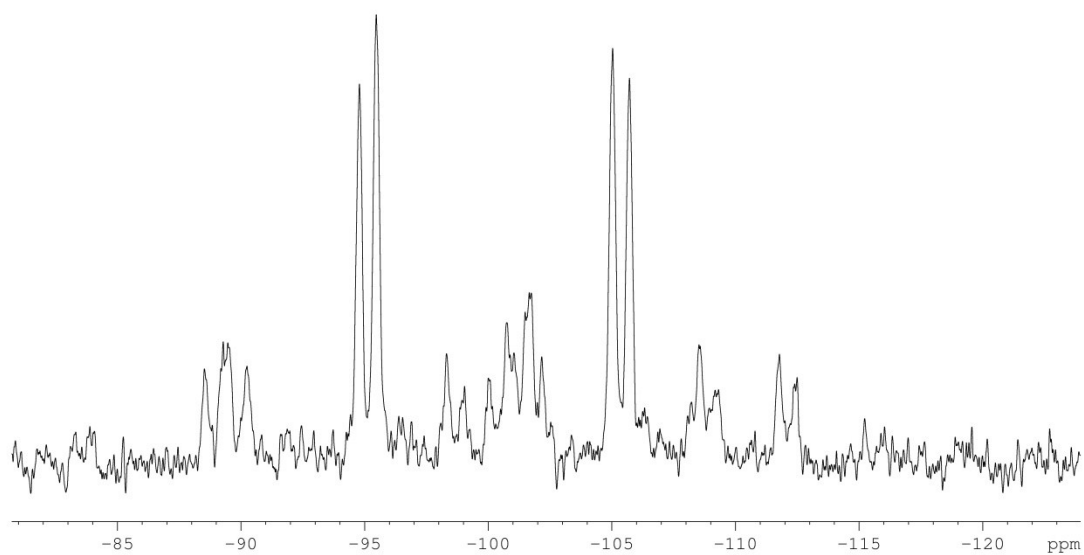

Figure S10:  $^{31}\text{P}\{^1\text{H}\}$  NMR spectrum of **2** ( $\text{C}_3\text{D}_6\text{O}$ , 162 MHz, 298 K)

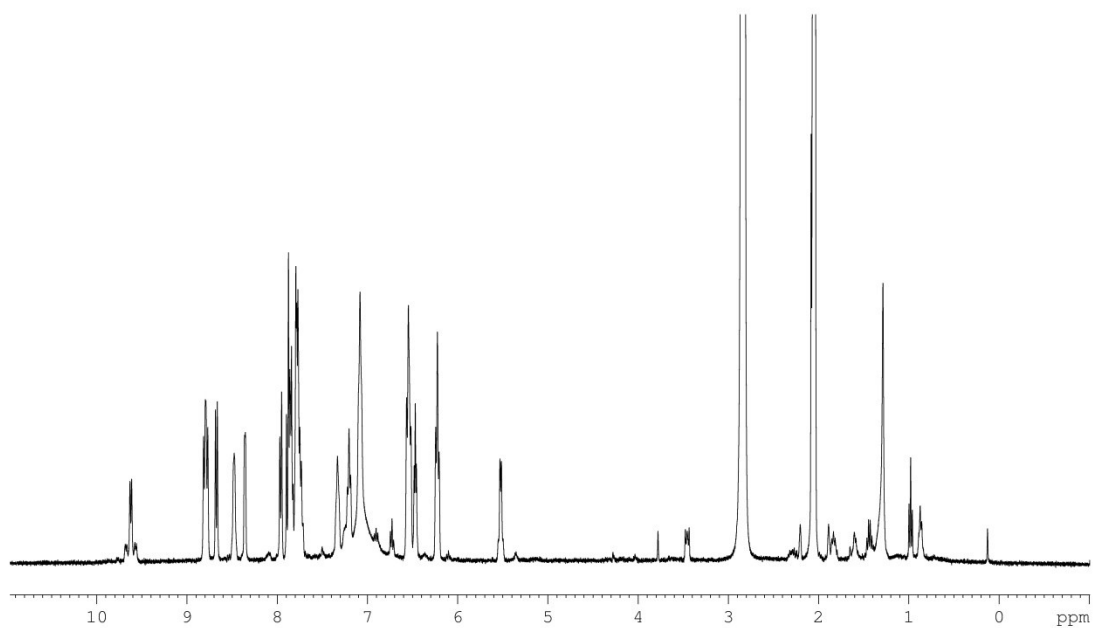

Figure S11:  $^1\text{H}$  NMR spectrum of **2** ( $\text{C}_3\text{D}_6\text{O}$ , 400 MHz, 298 K)

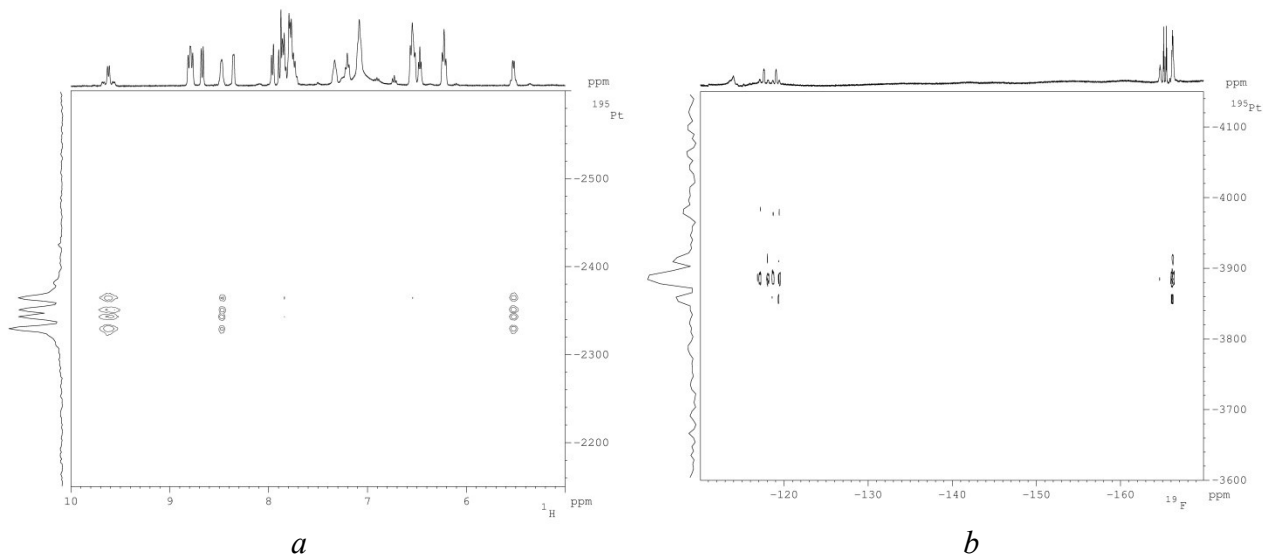

Figure S12 *a*:  $^1\text{H}$ - $^{195}\text{Pt}$  HMQC and *b*)  $^{19}\text{F}$ - $^{195}\text{Pt}$  HMQC spectra of **2** ( $\text{C}_3\text{D}_6\text{O}$ , 298 K).



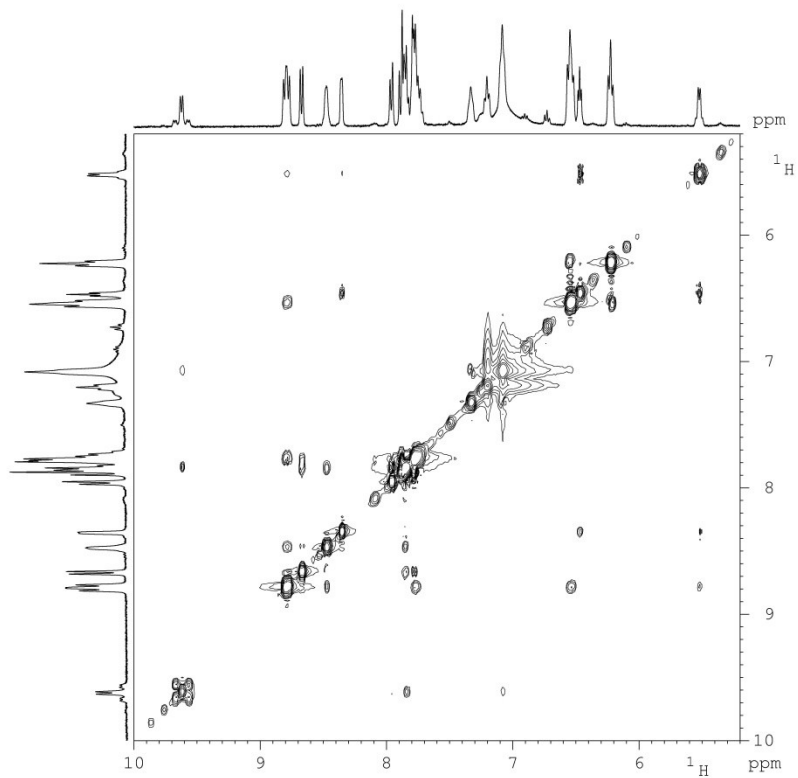

Figure S13. Low-field portion of the  $^1\text{H}$  NOESY spectrum of **2** ( $\text{C}_3\text{D}_6\text{O}$ , 400 MHz, 298 K).

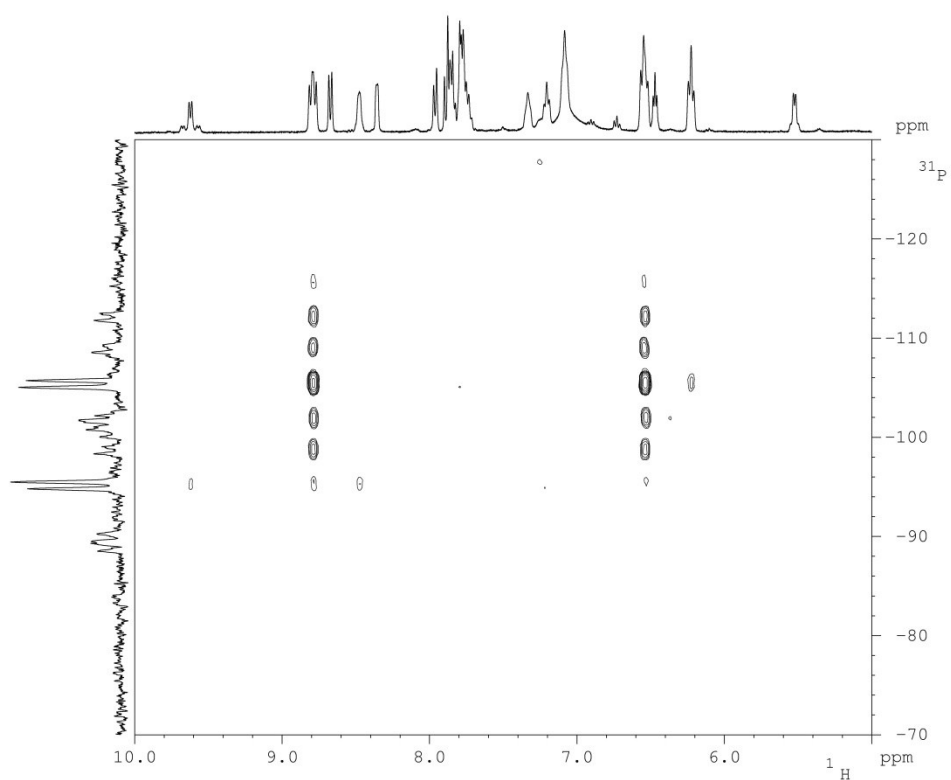

Figure S14. Portion of the  $^1\text{H}$ - $^{31}\text{P}$  HMQC spectrum of **2** ( $\text{C}_3\text{D}_6\text{O}$ , 298 K).

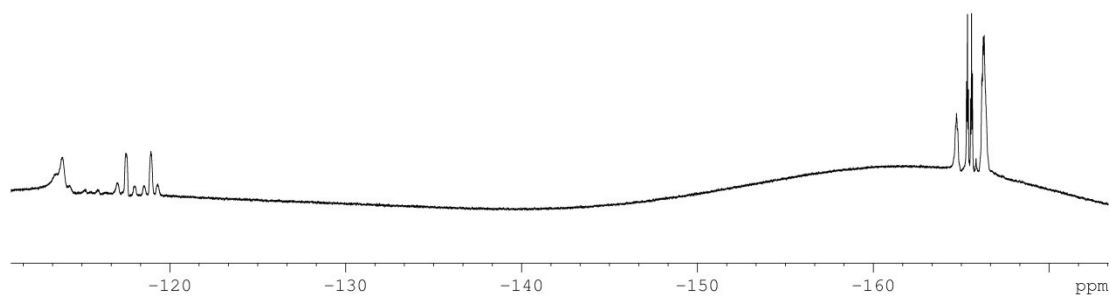

Figure S15:  $^{19}\text{F}$  NMR spectrum of **3** ( $\text{C}_3\text{D}_6\text{O}$ , 376 MHz, 298 K)

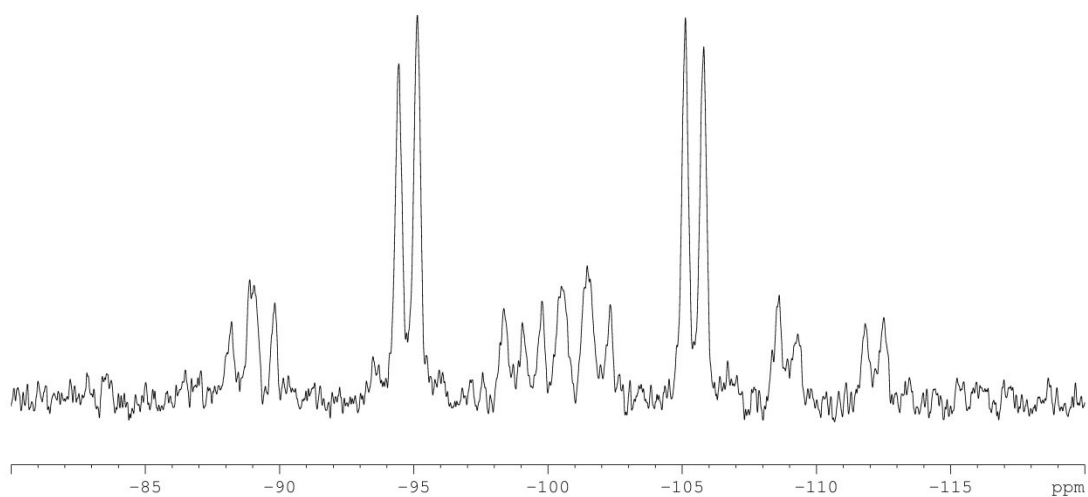

Figure S16:  $^{31}\text{P}\{^1\text{H}\}$  NMR spectrum of **3** ( $\text{C}_3\text{D}_6\text{O}$ , 162 MHz, 298 K)

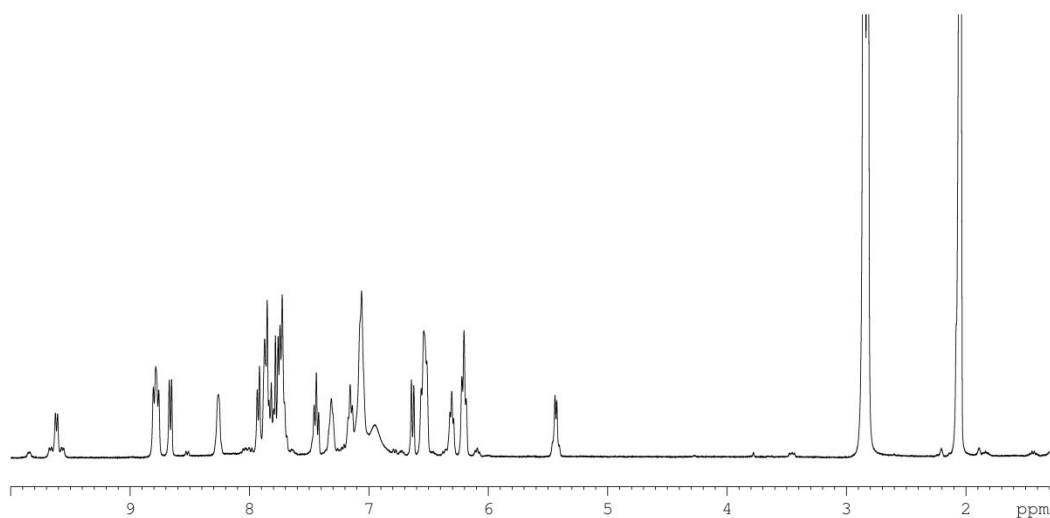

Figure S17:  $^1\text{H}$  NMR spectrum of **3** ( $\text{C}_3\text{D}_6\text{O}$ , 400 MHz, 298 K)

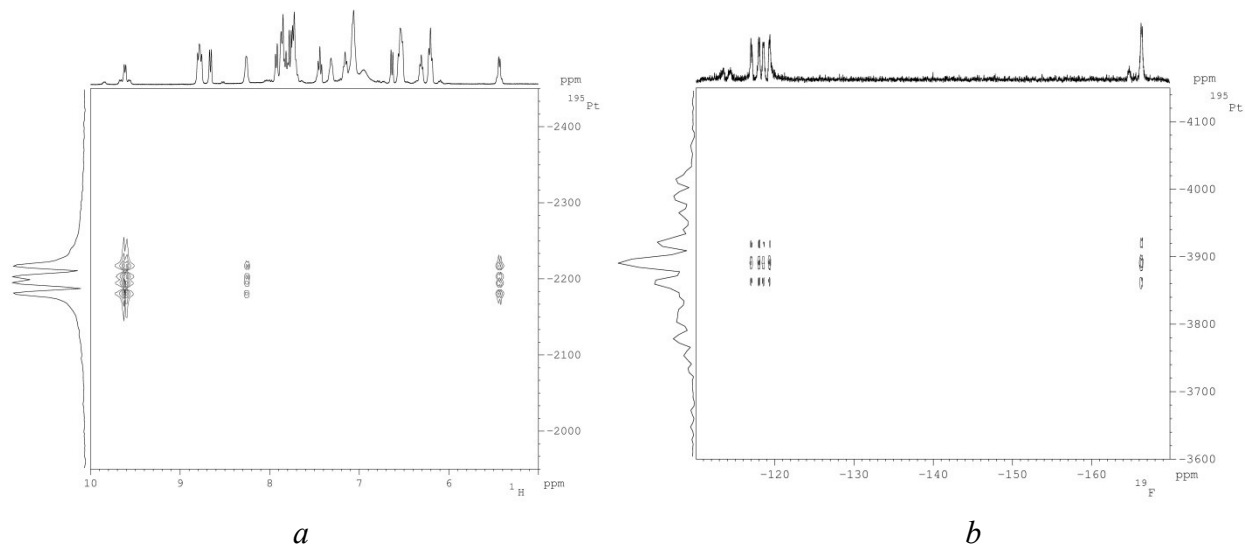

Figure S18 a:  $^1\text{H}$ - $^{195}\text{Pt}$  HMQC and b)  $^{19}\text{F}$ - $^{195}\text{Pt}$  HMQC spectra of **3** ( $\text{C}_3\text{D}_6\text{O}$ , 298 K).

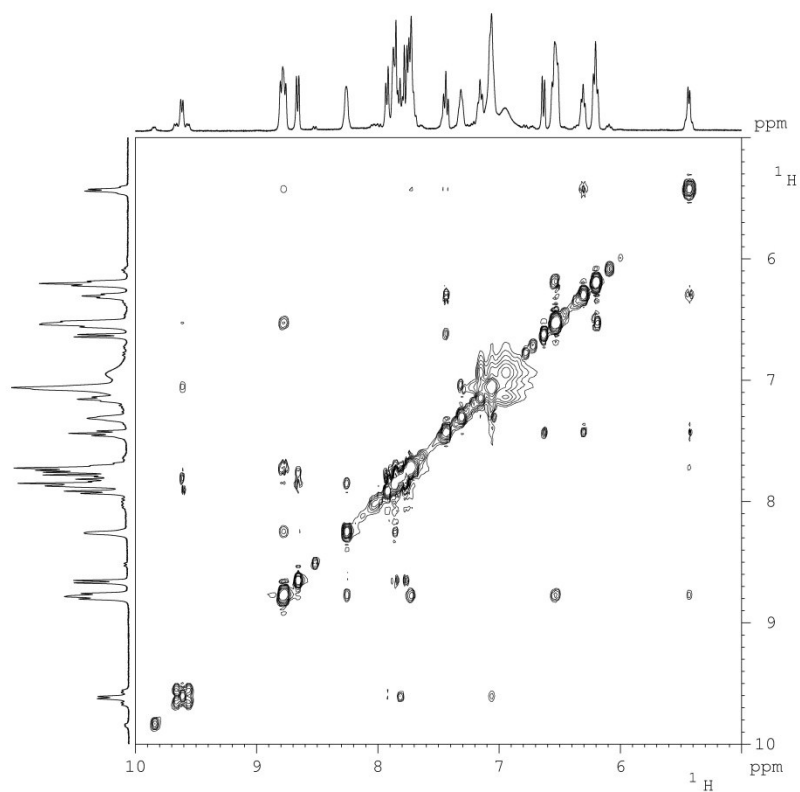

Figure S19: Low-field portion of the  $^1\text{H}$  NOESY spectrum of **3** ( $\text{C}_3\text{D}_6\text{O}$ , 400 MHz, 298 K).

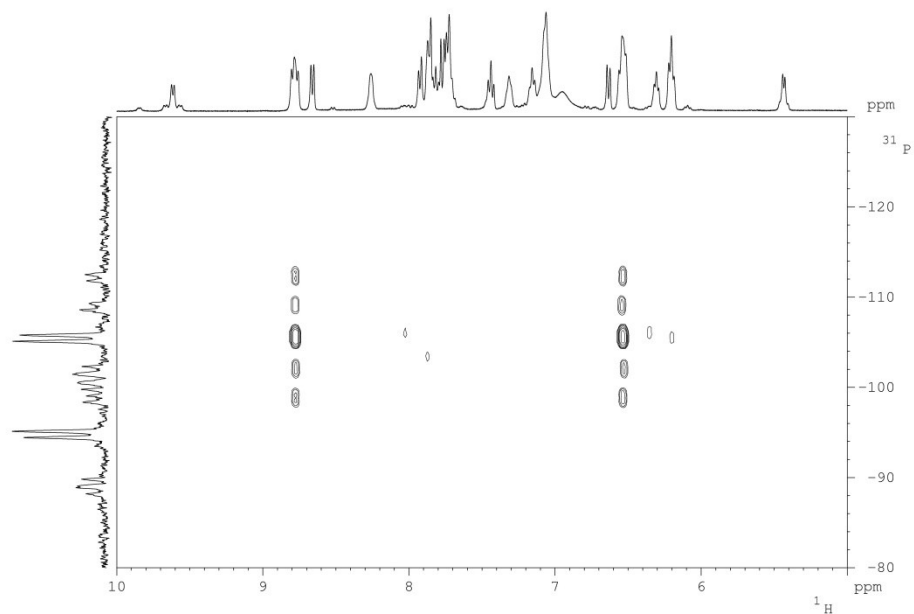

Figure S20: Portion of the  $^1\text{H}$ - $^{31}\text{P}$  HMQC spectrum of **3** ( $\text{C}_3\text{D}_6\text{O}$ , 298 K).

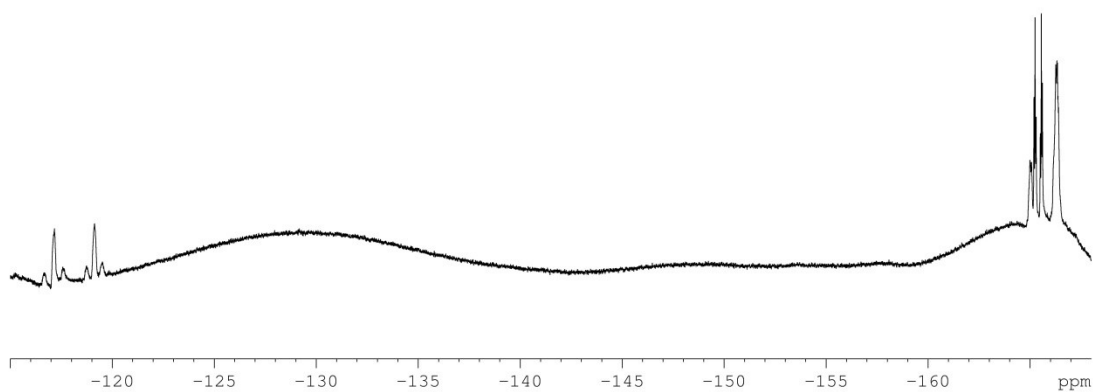

Figure S21:  $^{19}\text{F}$  NMR spectrum of **5** ( $\text{C}_3\text{D}_6\text{O}$ , 376 MHz, 298 K)

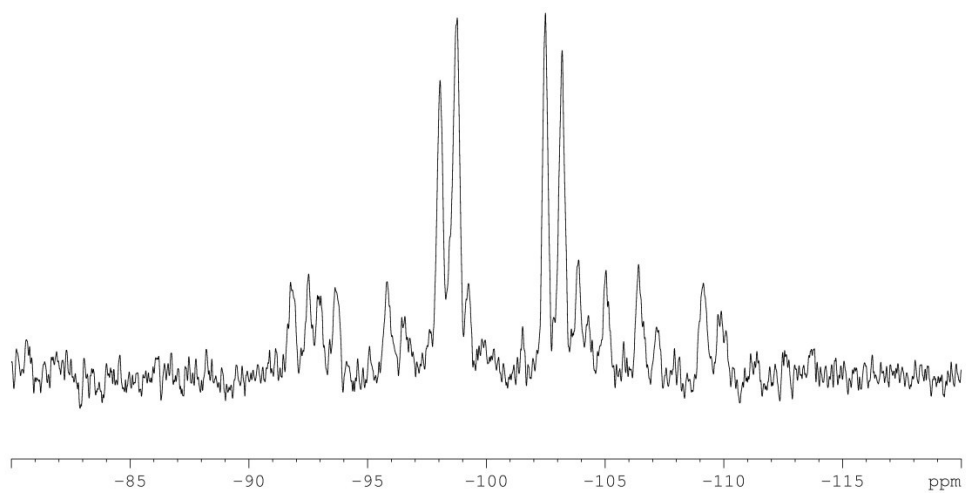

Figure S22:  $^{31}\text{P}\{^1\text{H}\}$  NMR spectrum of **5** ( $\text{C}_3\text{D}_6\text{O}$ , 162 MHz, 298 K)

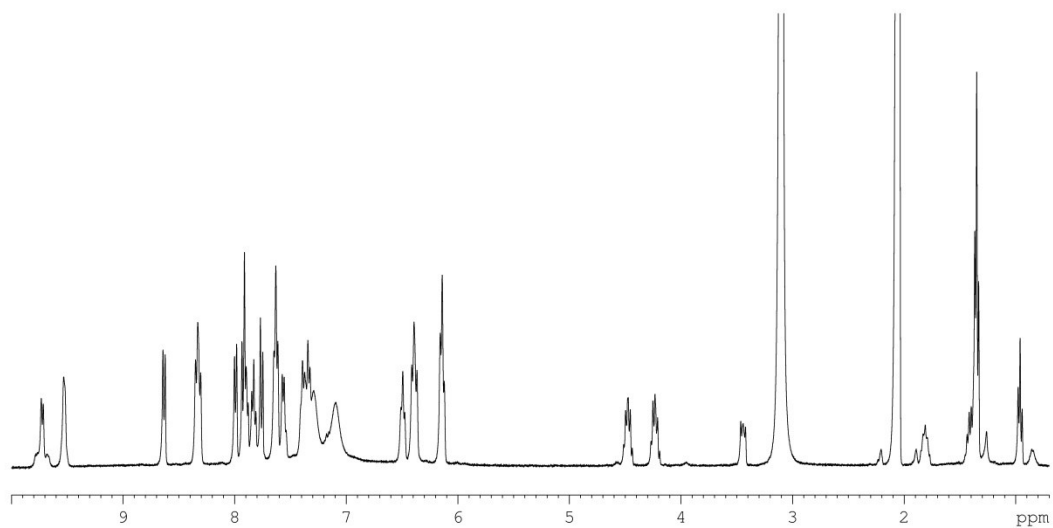

Figure S23:  $^1\text{H}$  NMR spectrum of **5** ( $\text{C}_3\text{D}_6\text{O}$ , 400 MHz, 298 K)

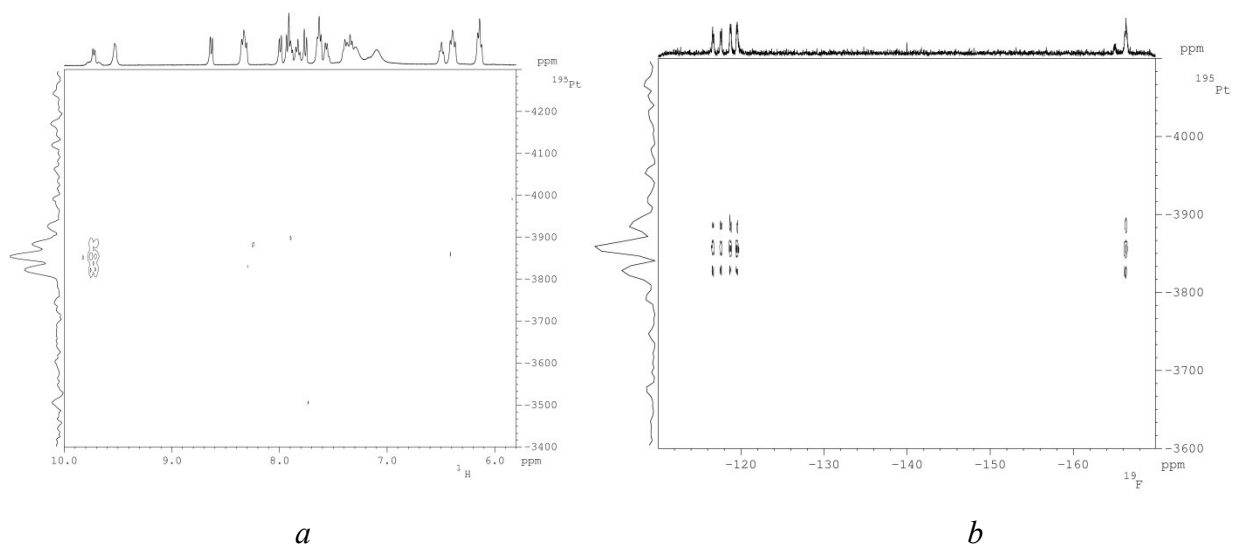

Figure S24 a:  $^1\text{H}$ - $^{195}\text{Pt}$  HMQC and b)  $^{19}\text{F}$ - $^{195}\text{Pt}$  HMQC spectra of **5** ( $\text{C}_3\text{D}_6\text{O}$ , 298 K).

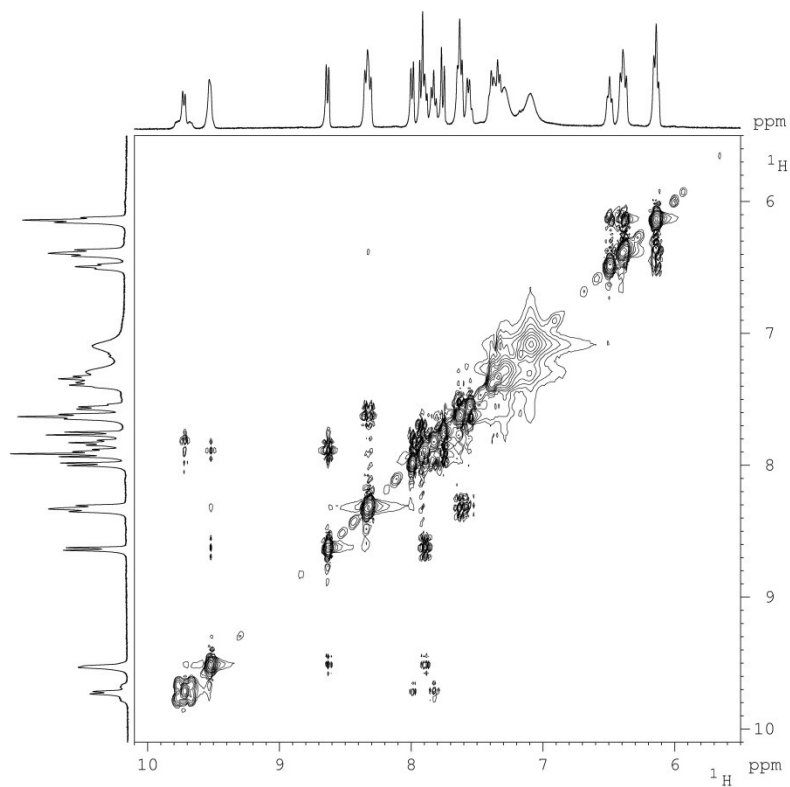

Figure S25: Low-field portion of the  $^1\text{H}$  NOESY spectrum of **5** ( $\text{C}_3\text{D}_6\text{O}$ , 400 MHz, 298 K)

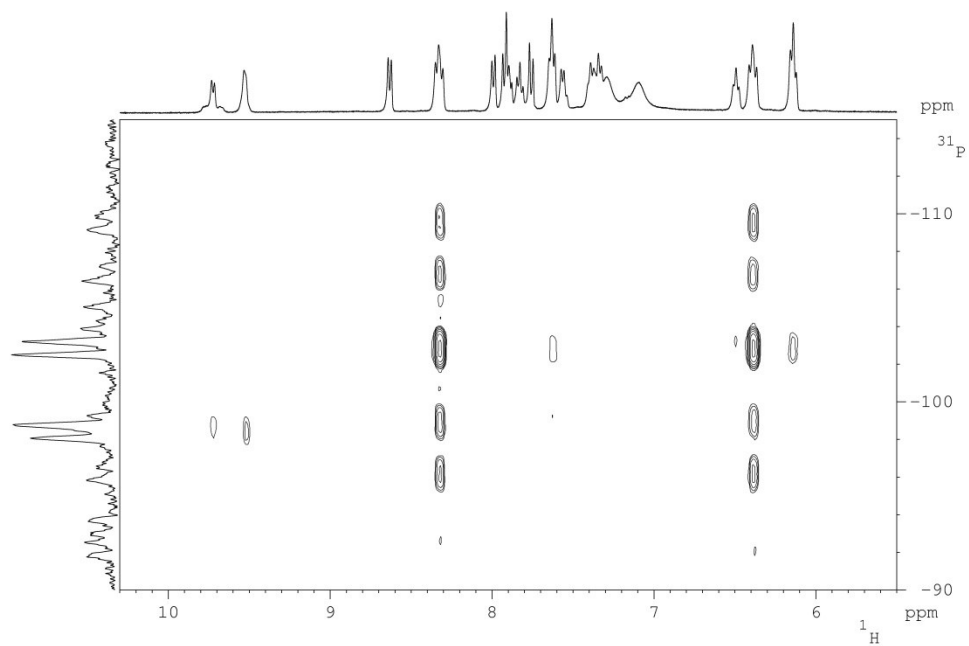

Figure S26: Portion of the  $^1\text{H}$ - $^{31}\text{P}$  HMQC spectrum of **5** ( $\text{C}_3\text{D}_6\text{O}$ , 298 K).

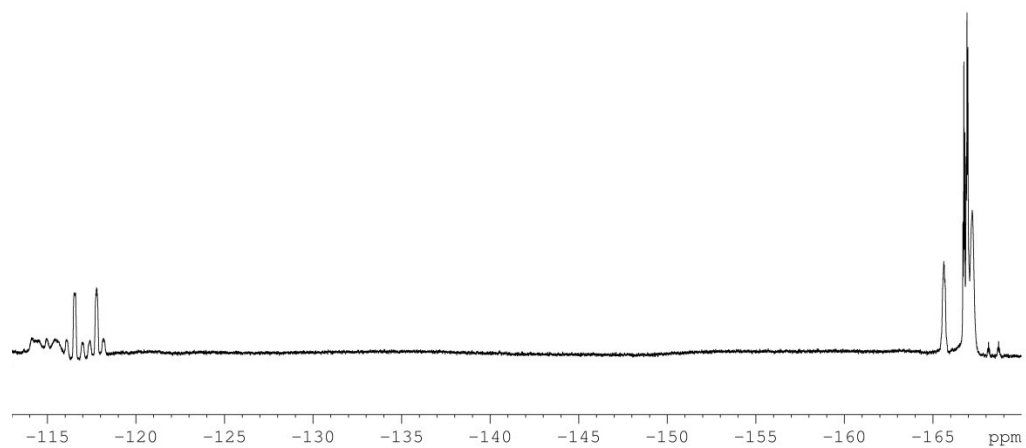

Figure S27:  $^{19}\text{F}$  NMR spectrum of **6** ( $\text{C}_3\text{D}_6\text{O}$ , 376 MHz, 298 K)

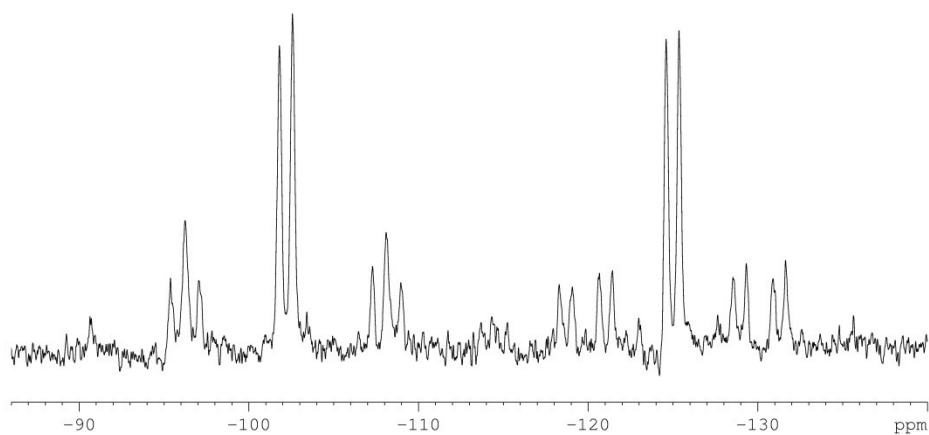

Figure S28:  $^{31}\text{P}\{^1\text{H}\}$  NMR spectrum of **6** ( $\text{C}_3\text{D}_6\text{O}$ , 162 MHz, 298 K)

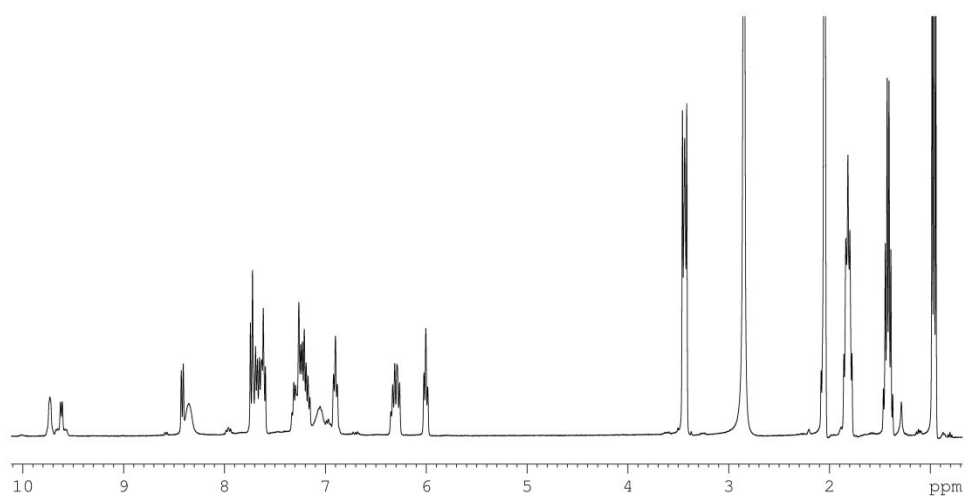

Figure S29:  $^1\text{H}$  NMR spectrum of **6** ( $\text{C}_3\text{D}_6\text{O}$ , 400 MHz, 298 K)

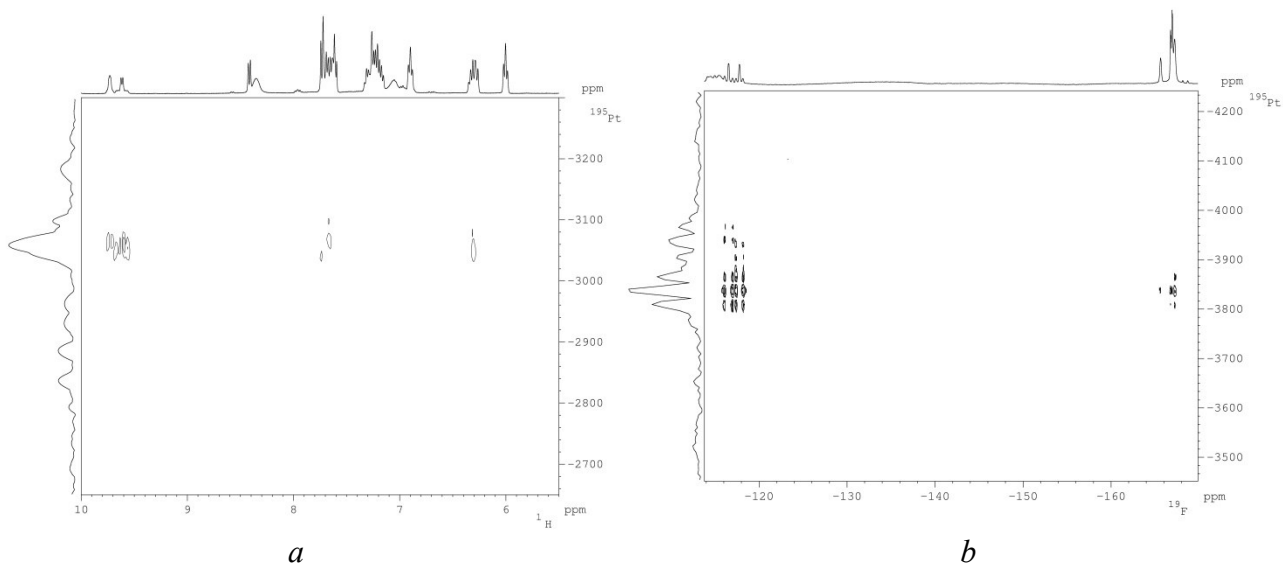

Figure S30 a:  $^1\text{H}$ - $^{195}\text{Pt}$  HMQC and b)  $^{19}\text{F}$ - $^{195}\text{Pt}$  HMQC spectra of **6** ( $\text{C}_3\text{D}_6\text{O}$ , 298 K).

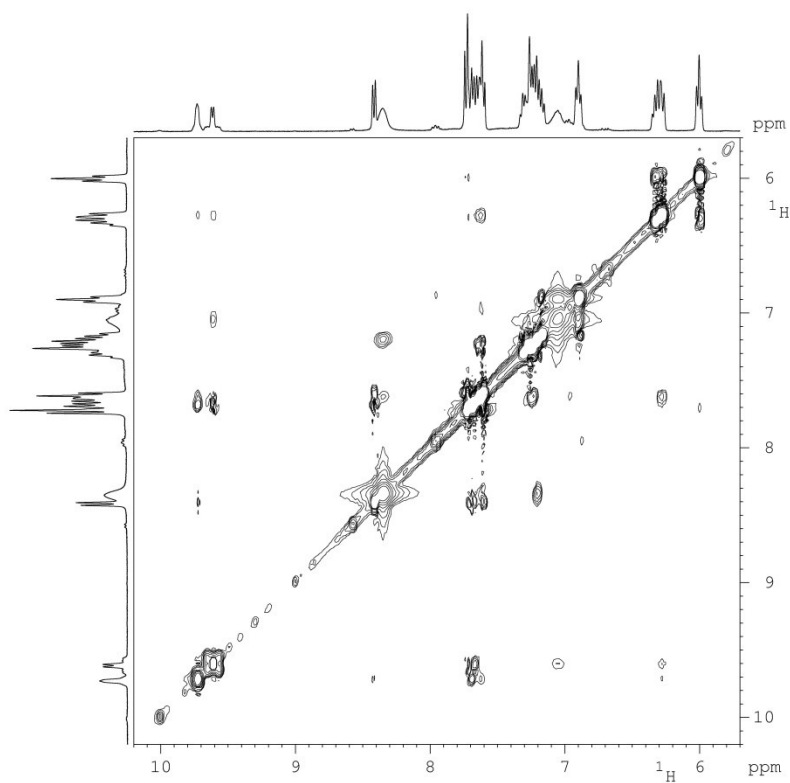

Figure S31: Low-field portion of the  $^1\text{H}$  NOESY spectrum of **6** ( $\text{C}_3\text{D}_6\text{O}$ , 400 MHz, 298 K).



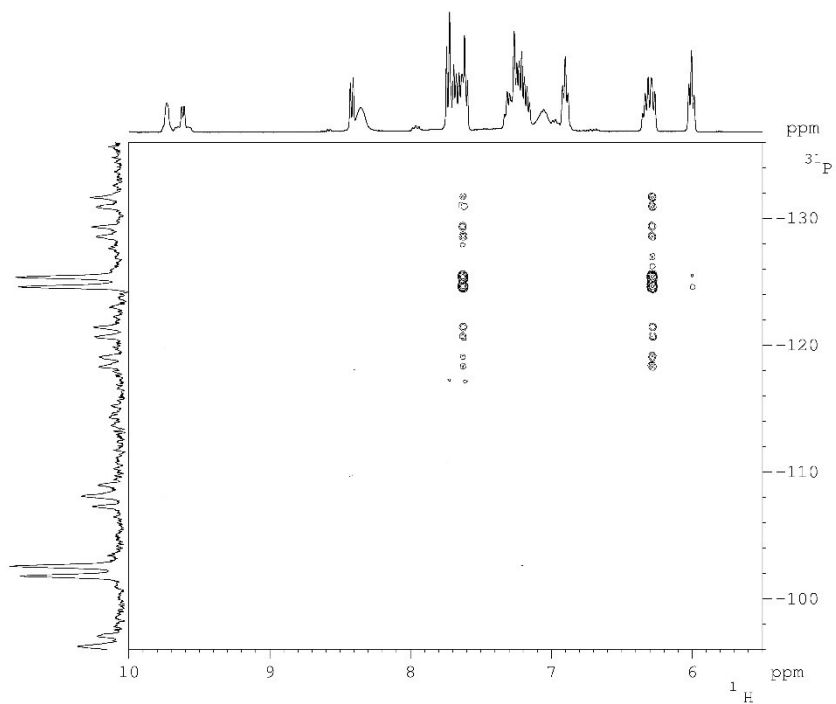

Figure S32: Portion of the  $^1\text{H}$ - $^{31}\text{P}$  HMQC spectrum of **6** ( $\text{C}_3\text{D}_6\text{O}$ , 298 K).

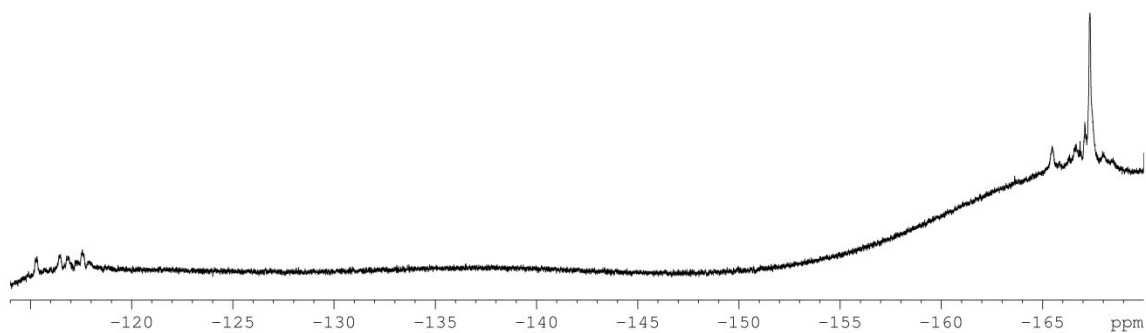

Figure S33:  $^{19}\text{F}$  NMR spectrum of **7** ( $\text{C}_3\text{D}_6\text{O}$ , 376 MHz, 298 K)

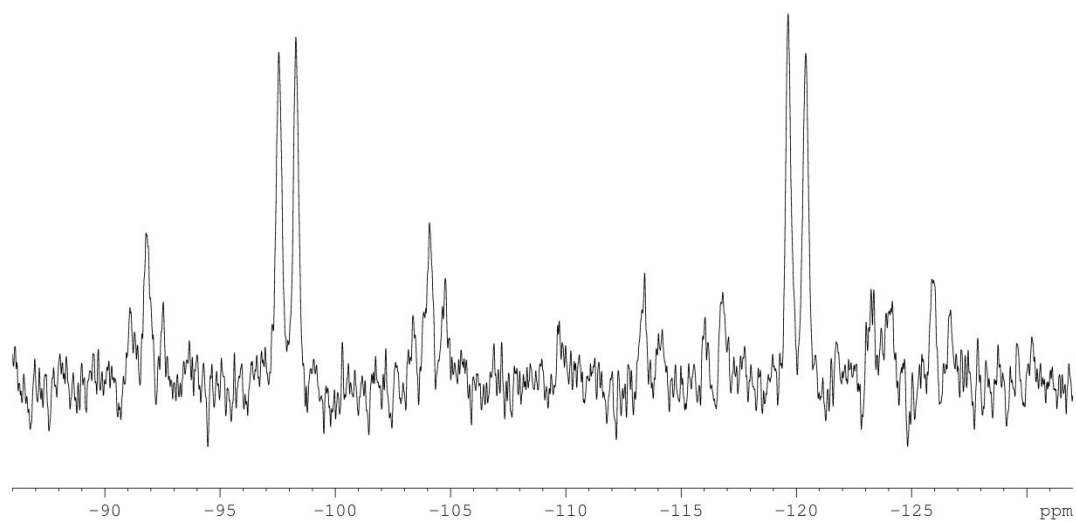

Figure S34:  $^{31}\text{P}\{^1\text{H}\}$  NMR spectrum of **7** ( $\text{C}_3\text{D}_6\text{O}$ , 162 MHz, 298 K)

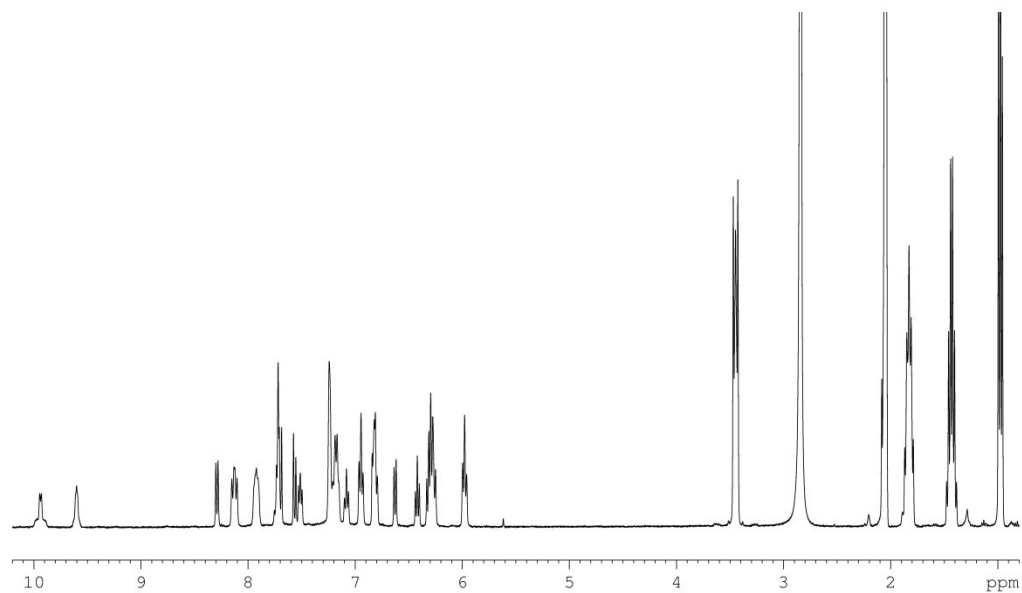

Figure S35:  $^1\text{H}$  NMR spectrum of **7** ( $\text{C}_3\text{D}_6\text{O}$ , 400 MHz, 298 K)

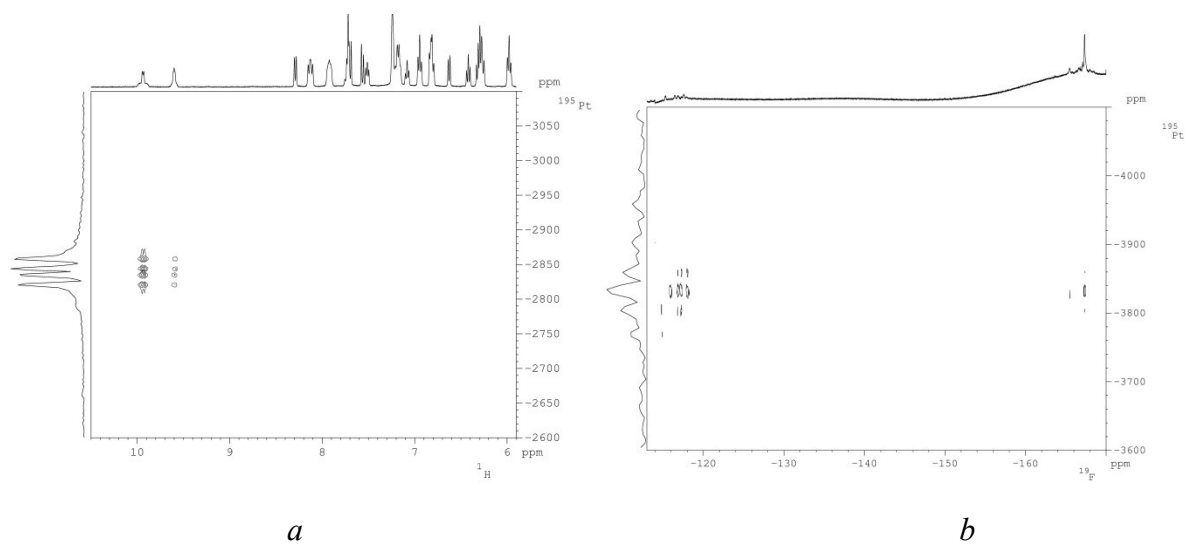

Figure S36 a:  $^1\text{H}$ - $^{195}\text{Pt}$  HMQC and b)  $^{19}\text{F}$ - $^{195}\text{Pt}$  HMQC spectra of **7** ( $\text{C}_3\text{D}_6\text{O}$ , 298 K).

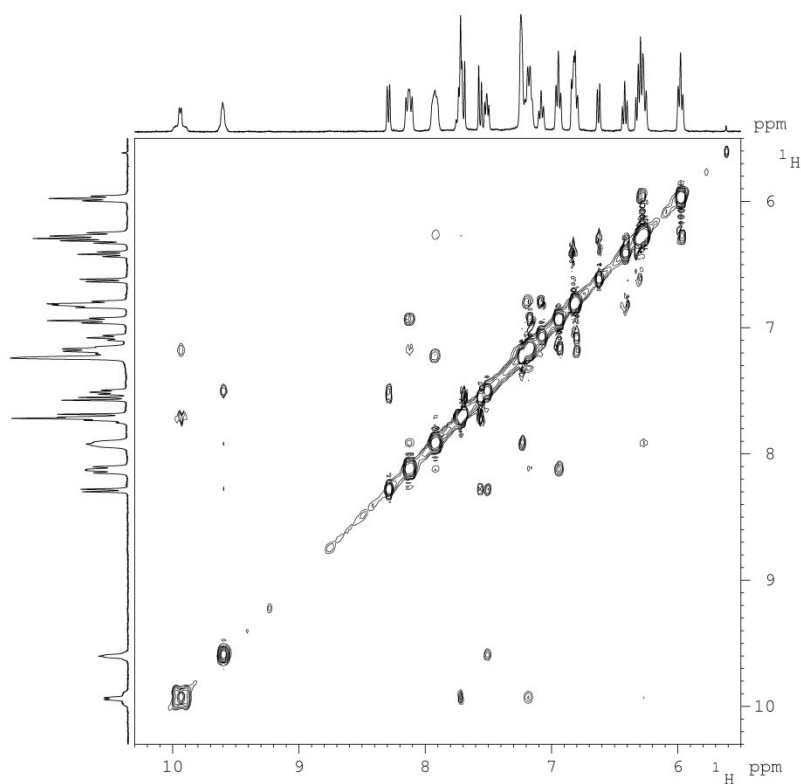

Figure S37: Low-field portion of the  $^1\text{H}$  NOESY spectrum of **7** ( $\text{C}_3\text{D}_6\text{O}$ , 400 MHz, 298 K).

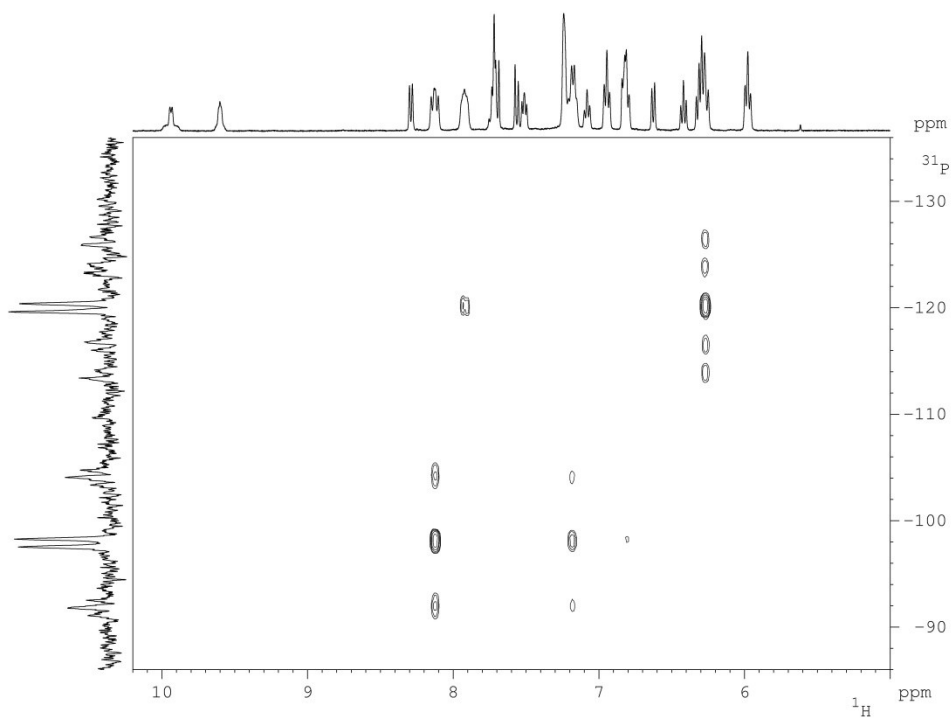

Figure S38. Portion of the  $^1\text{H}$ - $^{31}\text{P}$  HMQC spectrum of **7** ( $\text{C}_3\text{D}_6\text{O}$ , 298 K).

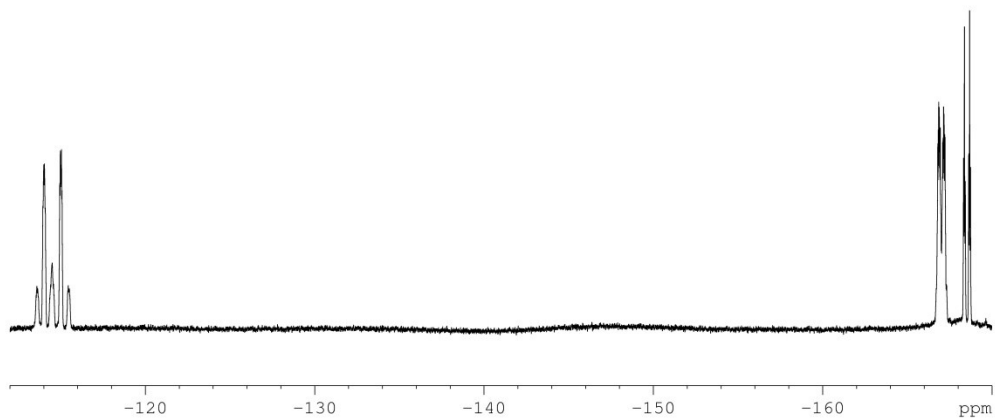

Figure S39:  $^{19}\text{F}$  NMR spectrum of **8** ( $\text{C}_3\text{D}_6\text{O}$ , 376 MHz, 298 K)

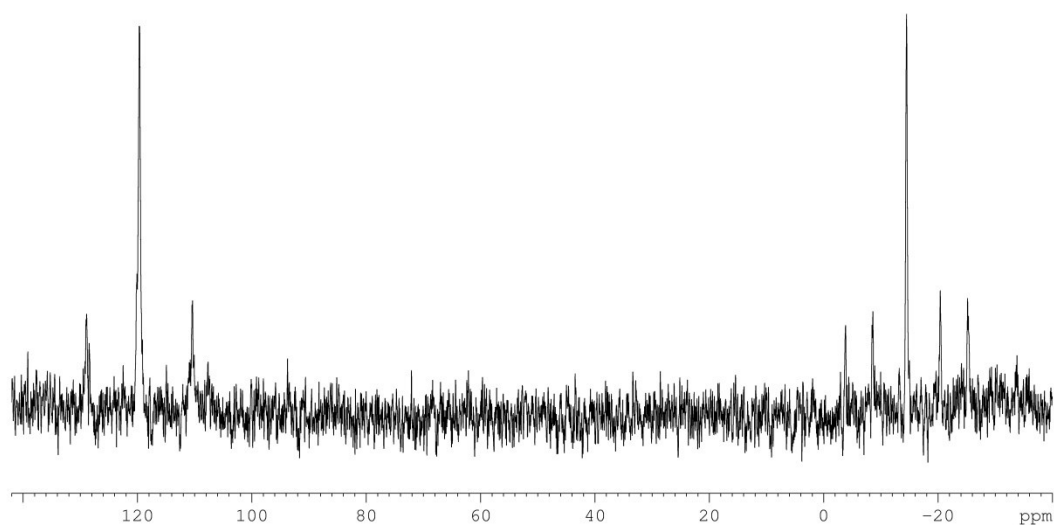

Figure S40:  $^{31}\text{P}\{^1\text{H}\}$  NMR spectrum of **8** ( $\text{C}_3\text{D}_6\text{O}$ , 162 MHz, 298 K)

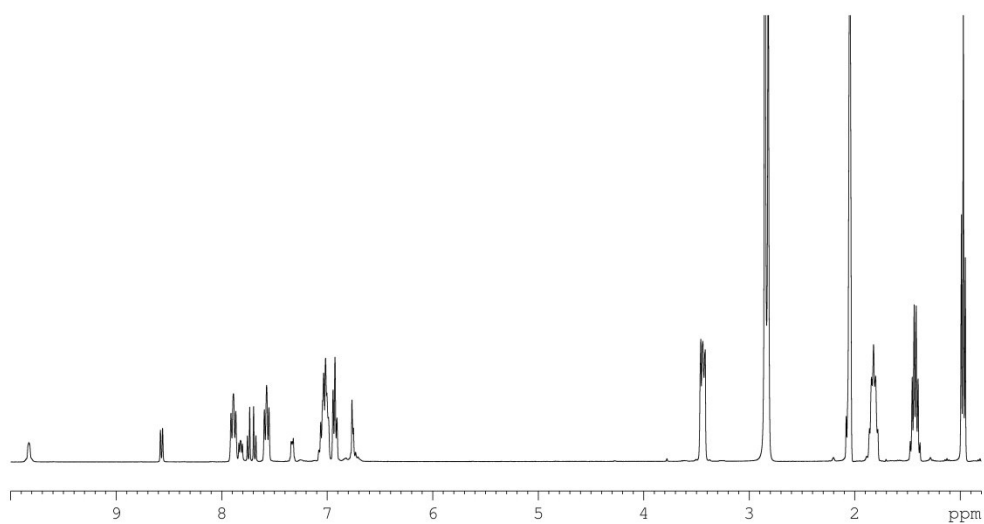

Figure S41:  $^1\text{H}$  NMR spectrum of **8** ( $\text{C}_3\text{D}_6\text{O}$ , 400 MHz, 298 K).

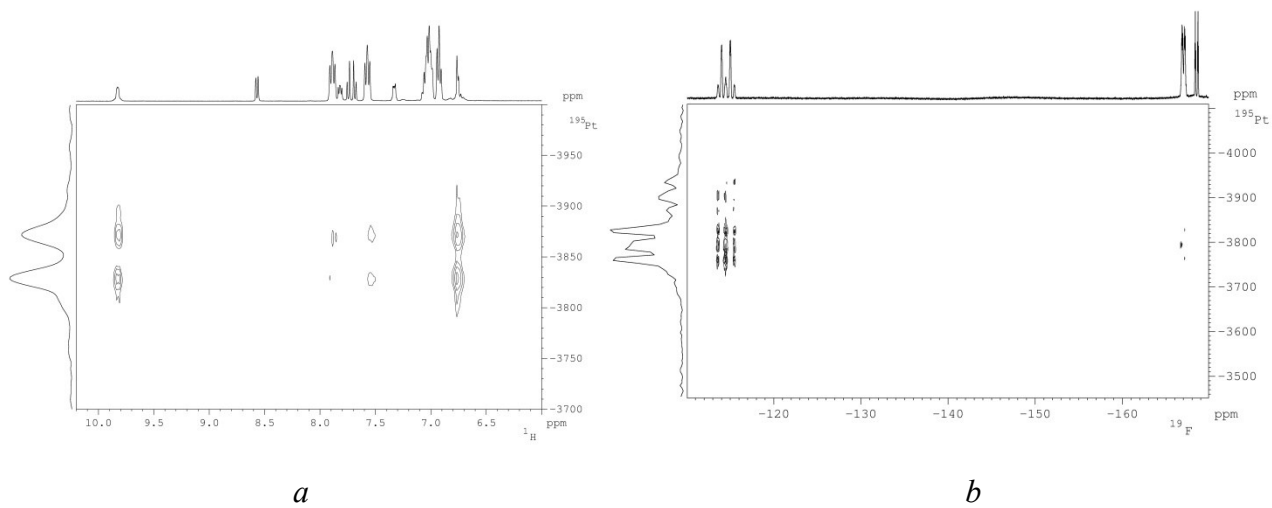

Figure S42 a:  $^1\text{H}$ - $^{195}\text{Pt}$  HMQC and b)  $^{19}\text{F}$ - $^{195}\text{Pt}$  HMQC spectra of **8** ( $\text{C}_3\text{D}_6\text{O}$ , 298 K).

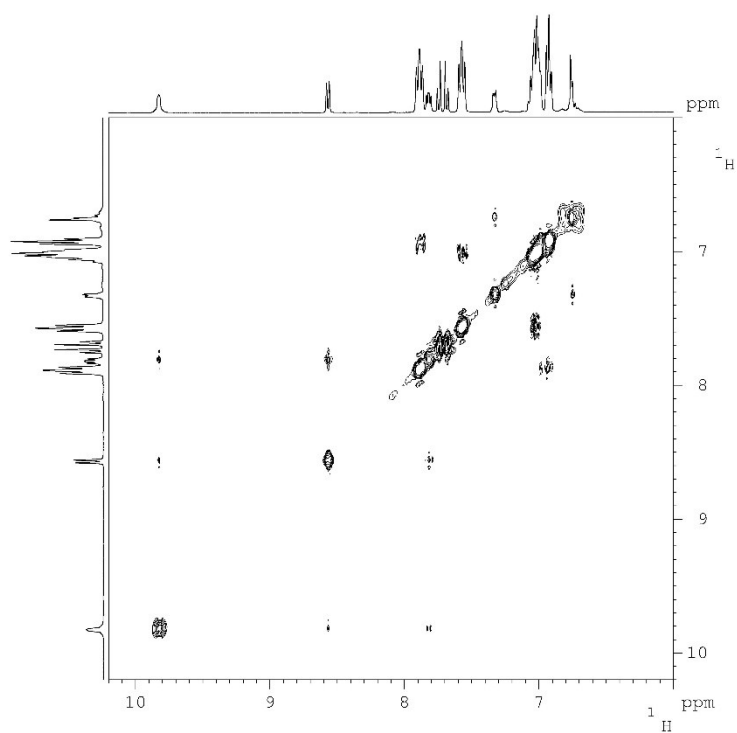

Figure S43: Low-field portion of the  $^1\text{H}$  NOESY spectrum of **8** ( $\text{C}_3\text{D}_6\text{O}$ , 400 MHz, 298 K).

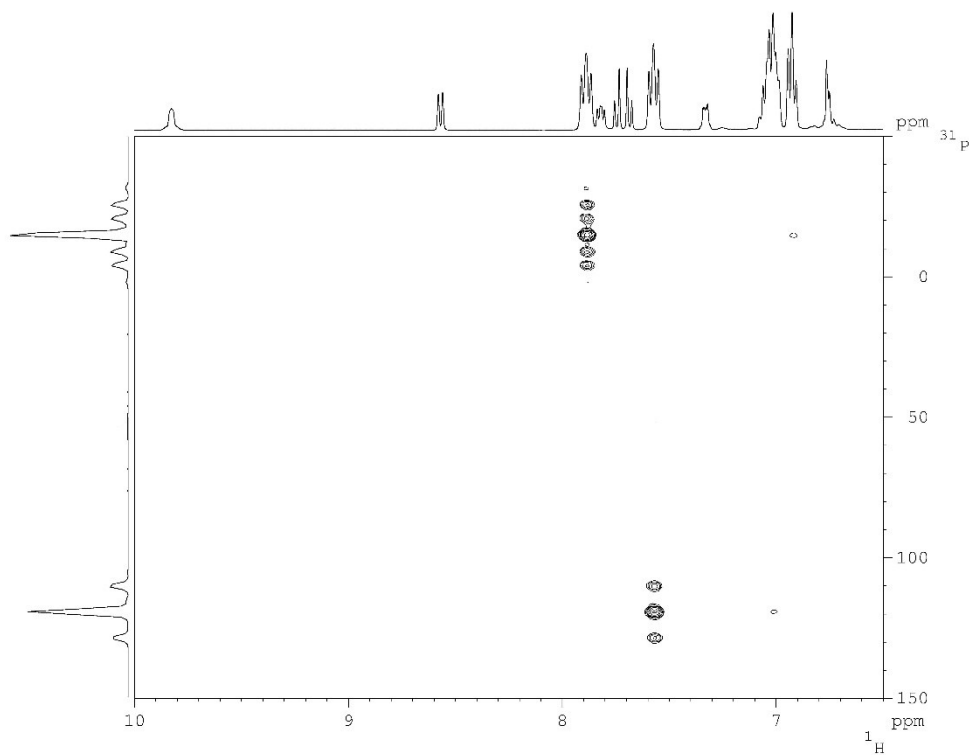

Figure S44: Portion of the  $^1\text{H}$ - $^{31}\text{P}$  HMQC spectrum of **8** ( $\text{C}_3\text{D}_6\text{O}$ , 298 K).

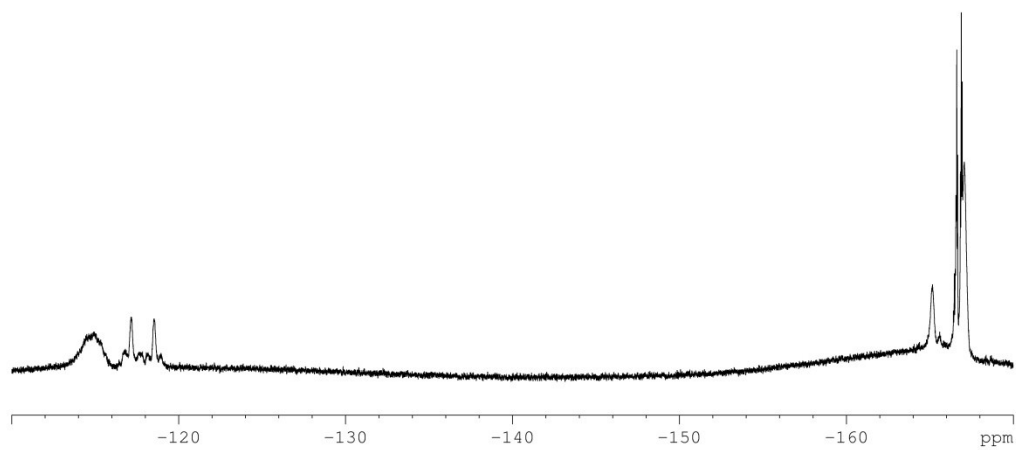

Figure S45:  $^{19}\text{F}$  NMR spectrum of **10** ( $\text{C}_3\text{D}_6\text{O}$ , 376 MHz, 298 K)

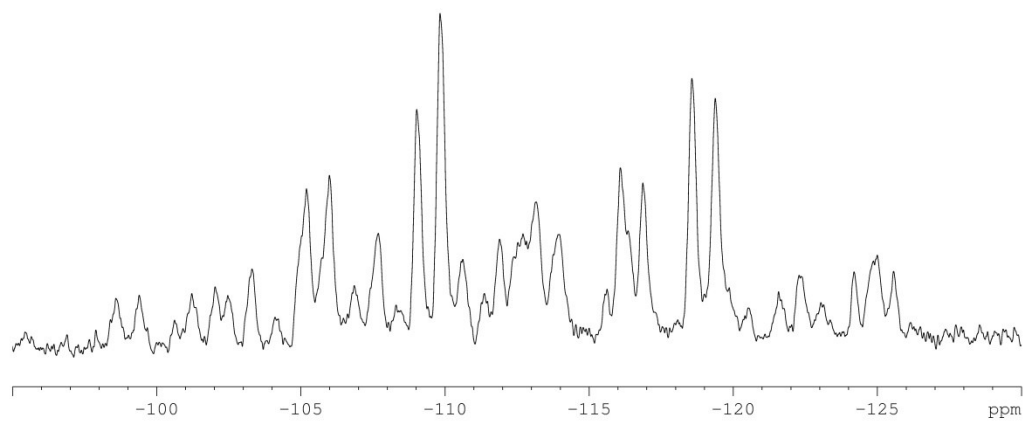

Figure S46:  $^{31}\text{P}\{^1\text{H}\}$  NMR spectrum of **10** ( $\text{C}_3\text{D}_6\text{O}$ , 162 MHz, 298 K)

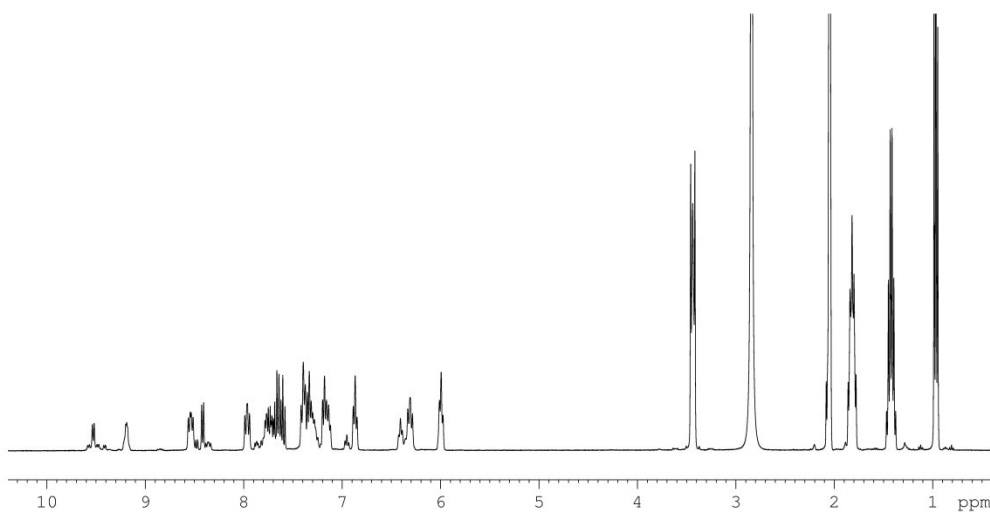

Figure S47:  $^1\text{H}$  NMR spectrum of **10** ( $\text{C}_3\text{D}_6\text{O}$ , 400 MHz, 298 K)

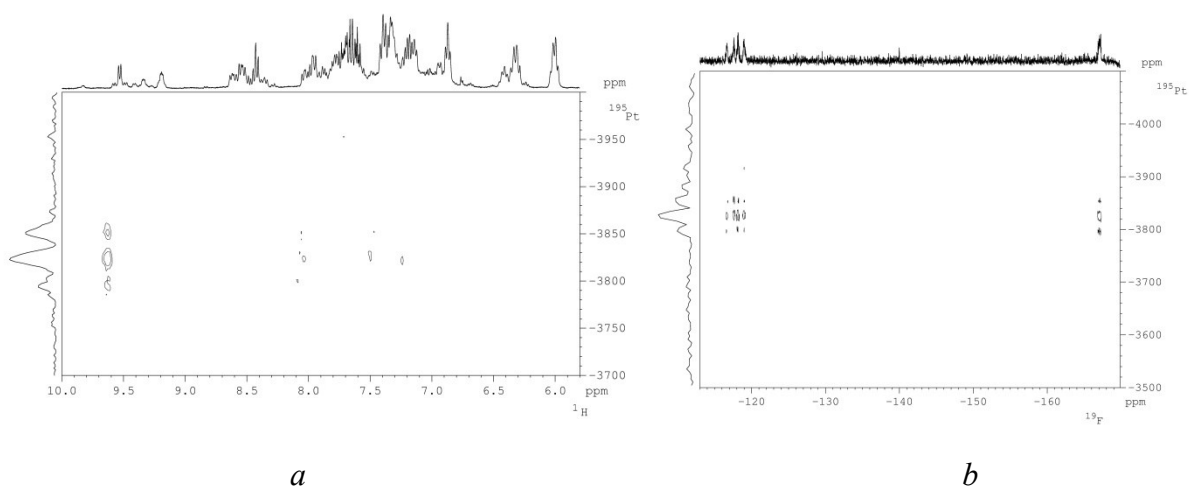

Figure S48 a:  $^1\text{H}$ - $^{195}\text{Pt}$  HMQC and b)  $^{19}\text{F}$ - $^{195}\text{Pt}$  HMQC spectra of **10** ( $\text{C}_3\text{D}_6\text{O}$ , 298 K).

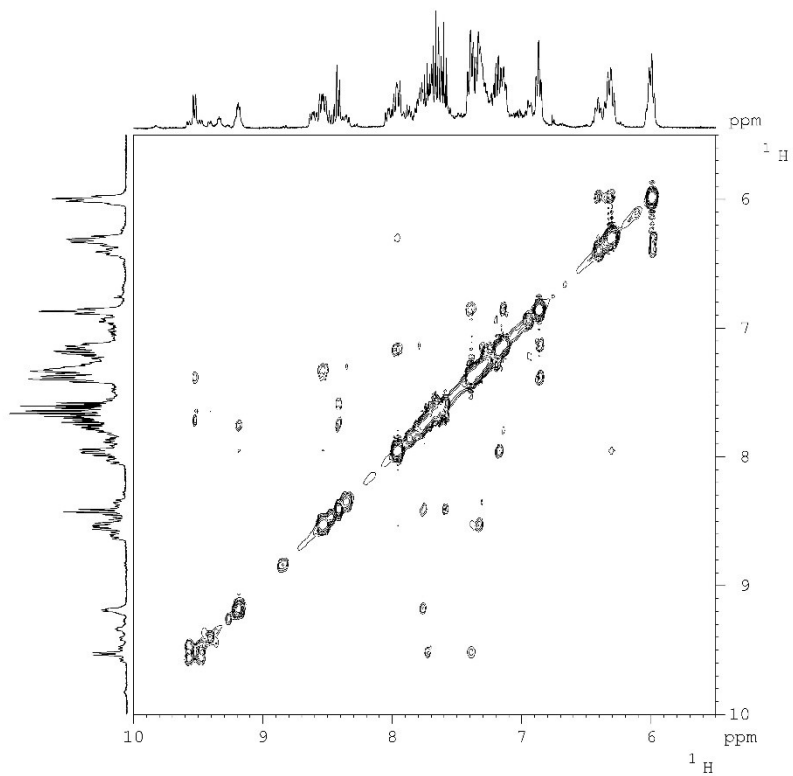

Figure S49: Low-field portion of the  $^1\text{H}$  NOESY spectrum of **10** ( $\text{C}_3\text{D}_6\text{O}$ , 400 MHz, 298 K).

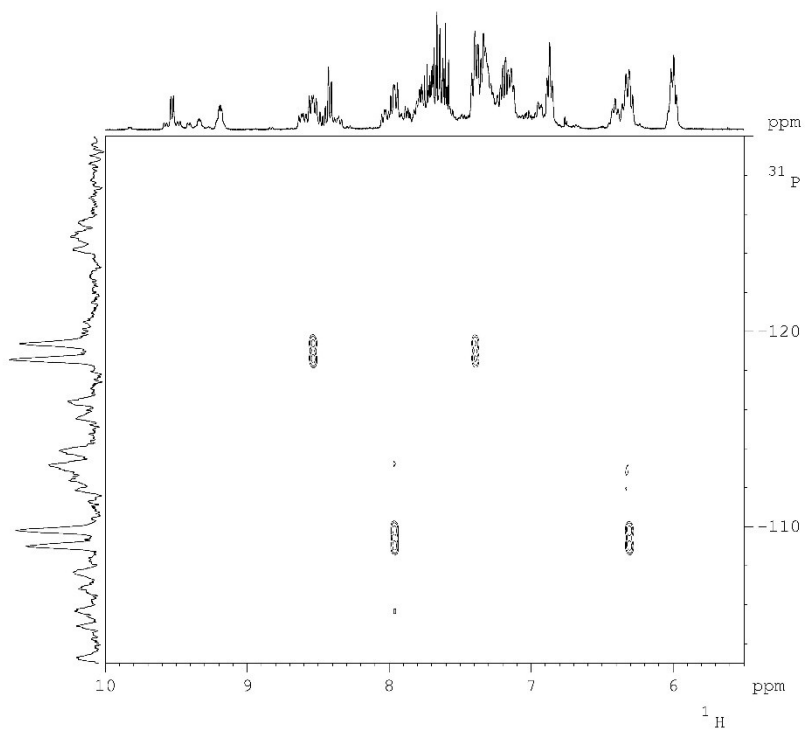

Figure S50: Portion of the  $^1\text{H}$ - $^{31}\text{P}$  HMQC spectrum of **10** ( $\text{C}_3\text{D}_6\text{O}$ , 298 K).



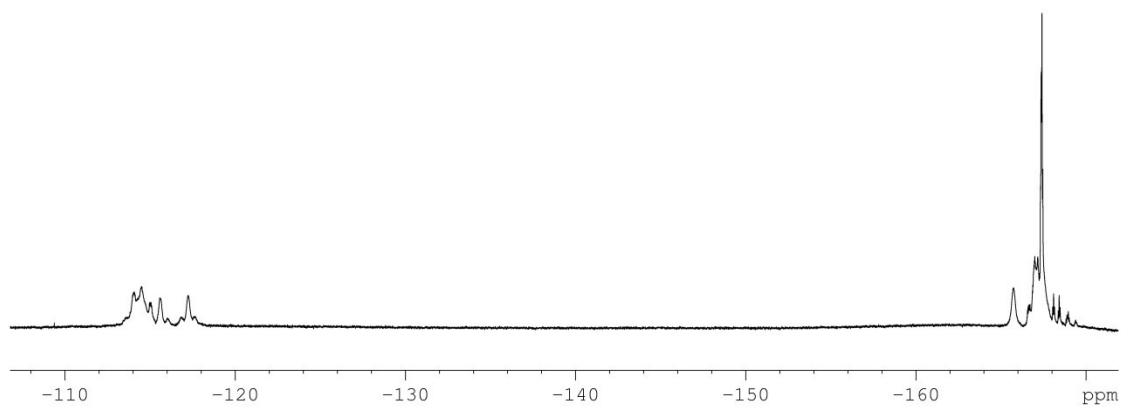

Figure S51:  $^{19}\text{F}$  NMR spectrum of **11** ( $\text{C}_3\text{D}_6\text{O}$ , 376 MHz, 298 K)

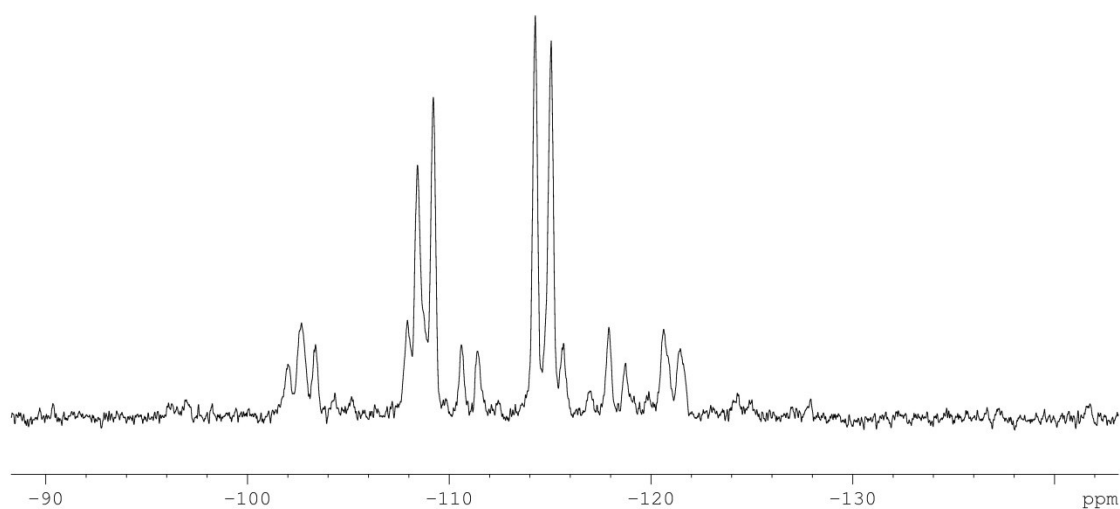

Figure S52:  $^{31}\text{P}\{^1\text{H}\}$  NMR spectrum of **11** ( $\text{C}_3\text{D}_6\text{O}$ , 162 MHz, 298 K)

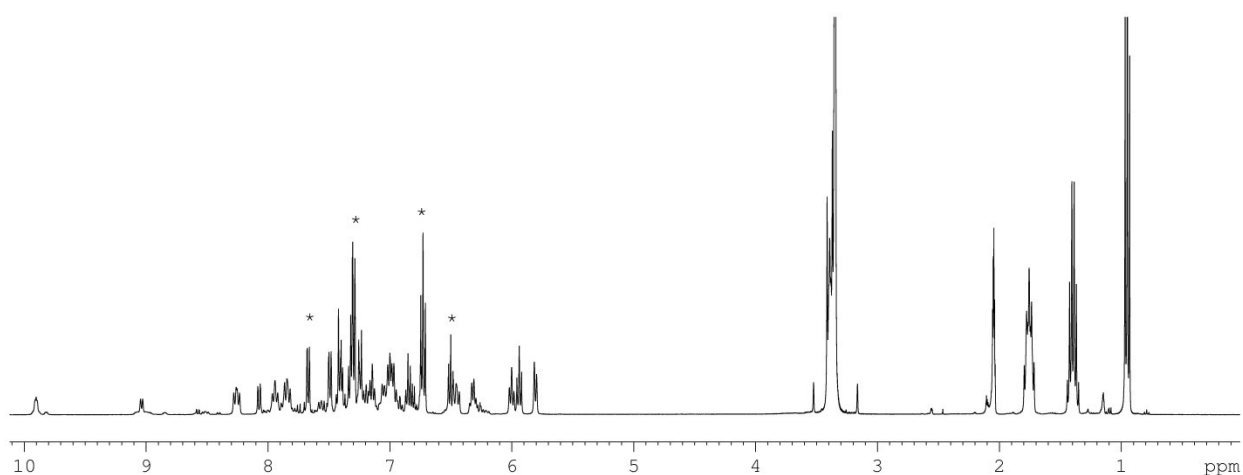

Figure S53:  $^1\text{H}$  NMR spectrum of **11** ( $\text{C}_3\text{D}_6\text{O}$ , 400 MHz, 298 K). Asterisked peaks belong to free  $\text{NBu}_4\text{PhS}$ .

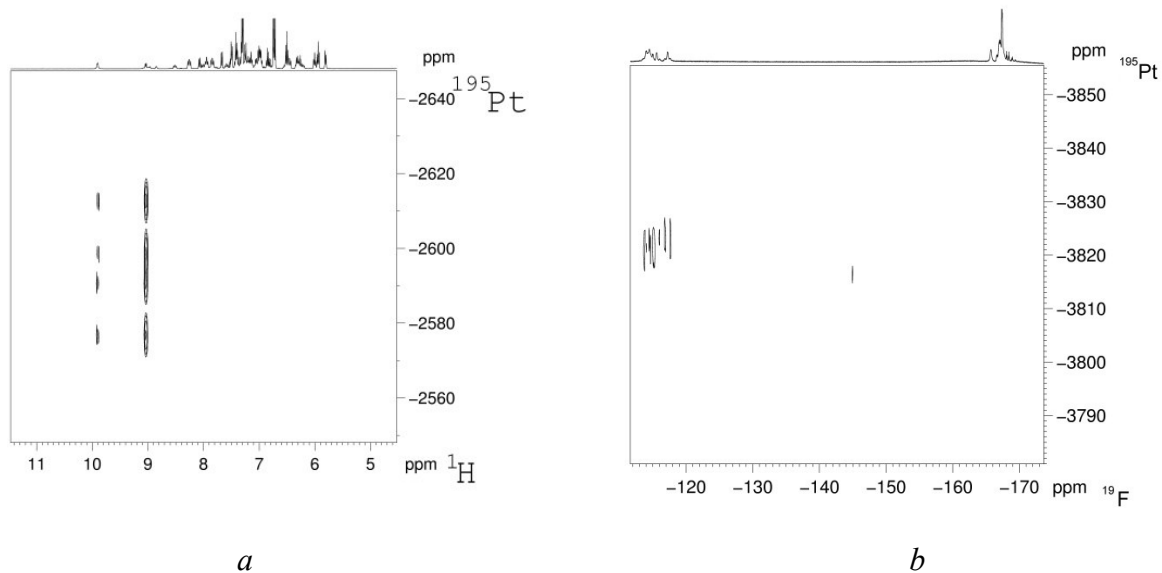

Figure S54 a:  $^1\text{H}$ - $^{195}\text{Pt}$  HMQC and b)  $^{19}\text{F}$ - $^{195}\text{Pt}$  HMQC spectra of **11** ( $\text{C}_3\text{D}_6\text{O}$ , 298 K).

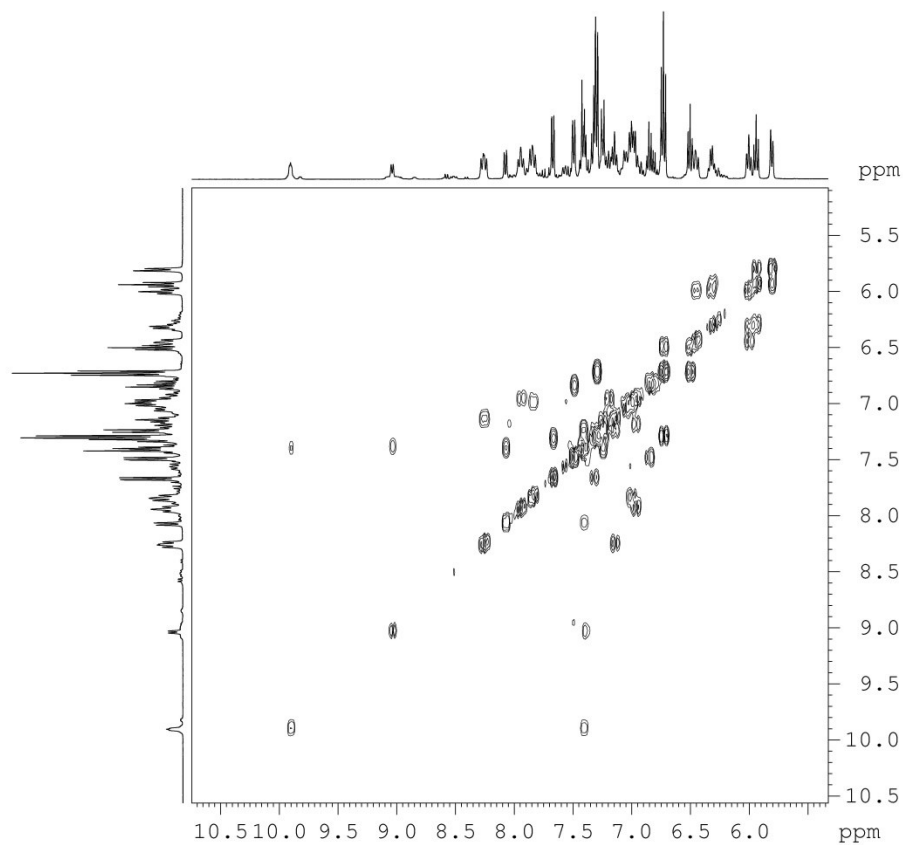

Figure S55: Low-field portion of the  $^1\text{H}$  COSY spectrum of **11** ( $\text{C}_3\text{D}_6\text{O}$ , 400 MHz, 298 K).

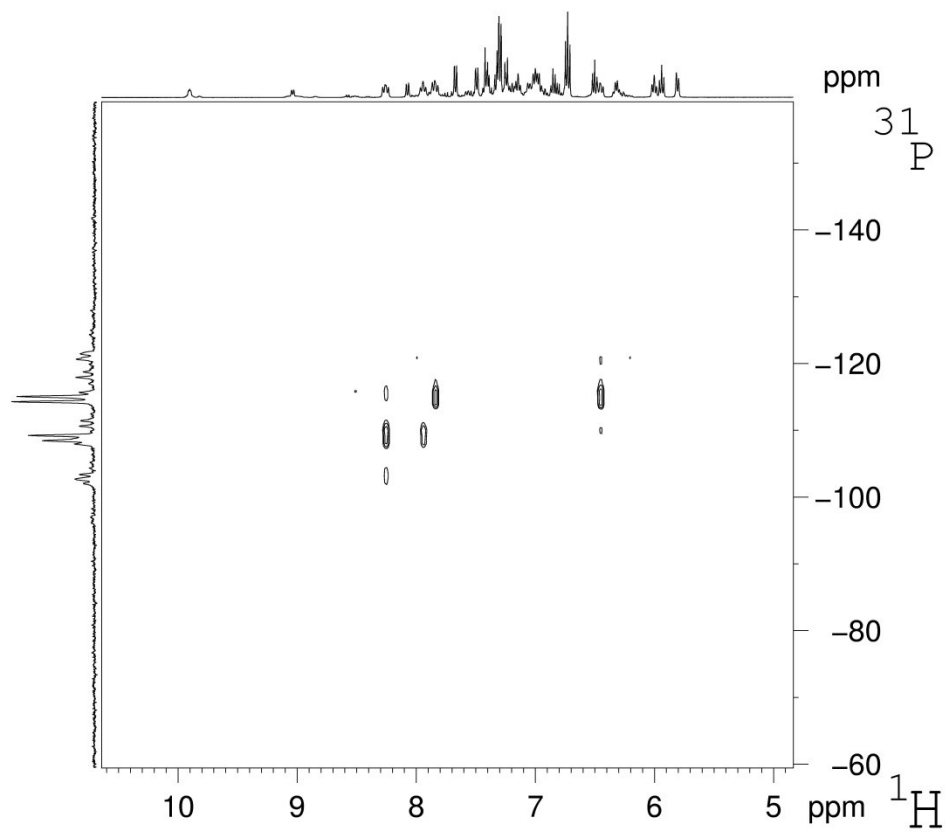

Figure S56: Portion of the  $^1\text{H}$ - $^{31}\text{P}$  HMQC spectrum of **11** ( $\text{C}_3\text{D}_6\text{O}$ , 298 K).

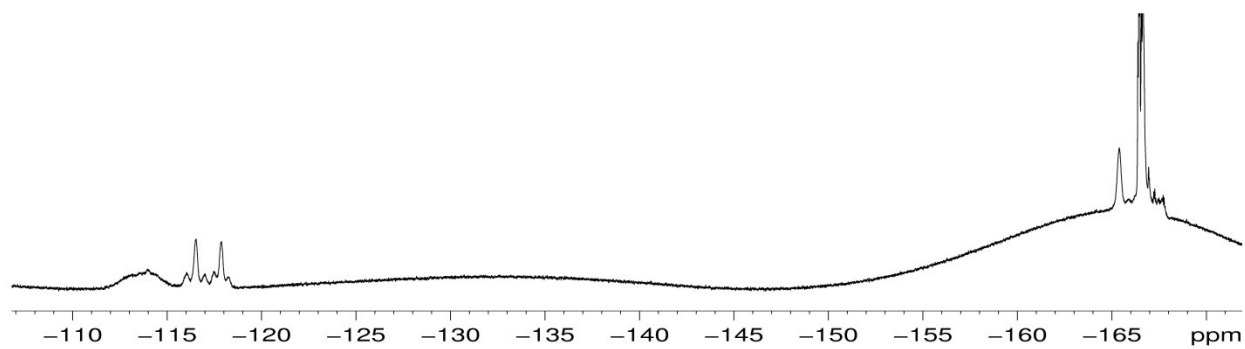

Figure S57:  $^{19}\text{F}$  NMR spectrum of *cis*-**12** ( $\text{C}_3\text{D}_6\text{O}$ , 376 MHz, 298 K)

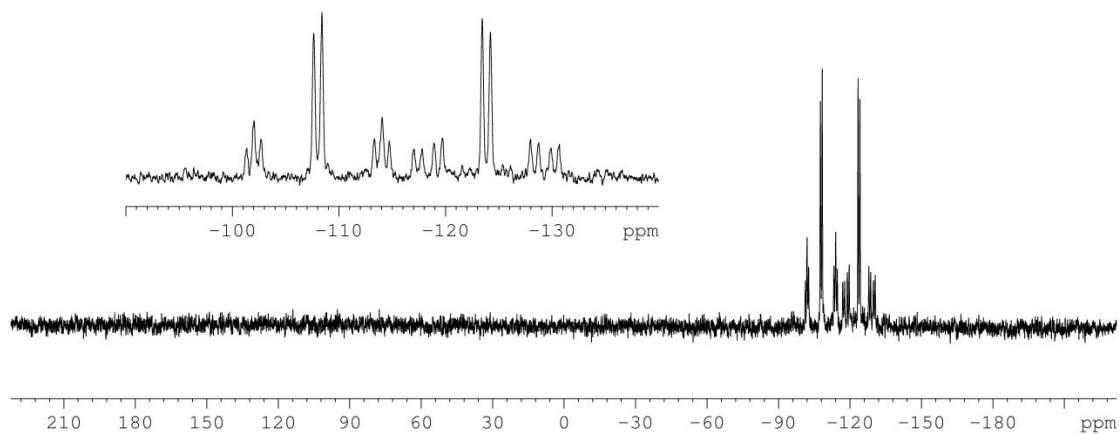

Figure S58:  $^{31}\text{P}\{^1\text{H}\}$  NMR spectrum of *cis*-**12** ( $\text{C}_3\text{D}_6\text{O}$ , 162 MHz, 298 K)

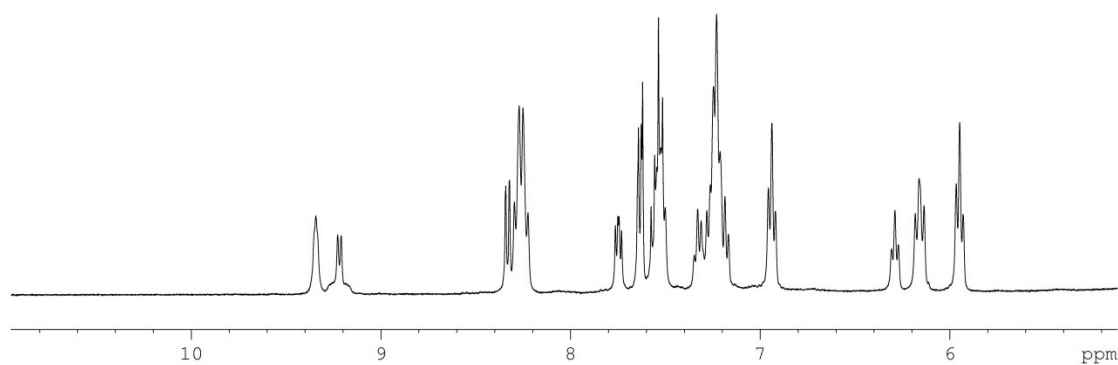

Figure S59: Lowfield part of the  $^1\text{H}$  NMR spectrum of *cis*-**12** ( $\text{C}_3\text{D}_6\text{O}$ , 400 MHz, 298 K).

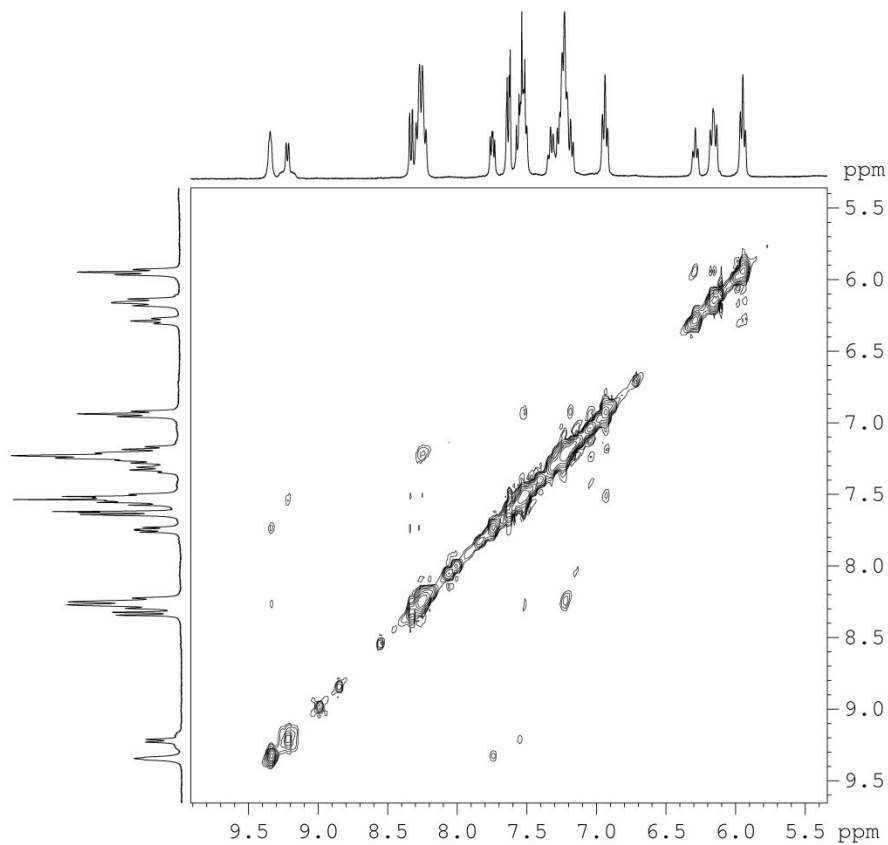

Figure S60: Low-field portion of the  $^1\text{H}$  NOESY spectrum of *cis*-**12** ( $\text{C}_3\text{D}_6\text{O}$ , 400 MHz, 298 K).
